# Supplementary material
Source: ML conference proceedings conference paper supplement (https://openreview.net/forum?id=fy5InEg0OL)

# Llama-3.1-8B

Short instructions  
real\_text baseline

Short instructions  
other\_task\_prompt baseline

Short instructions  
equiprobable baseline

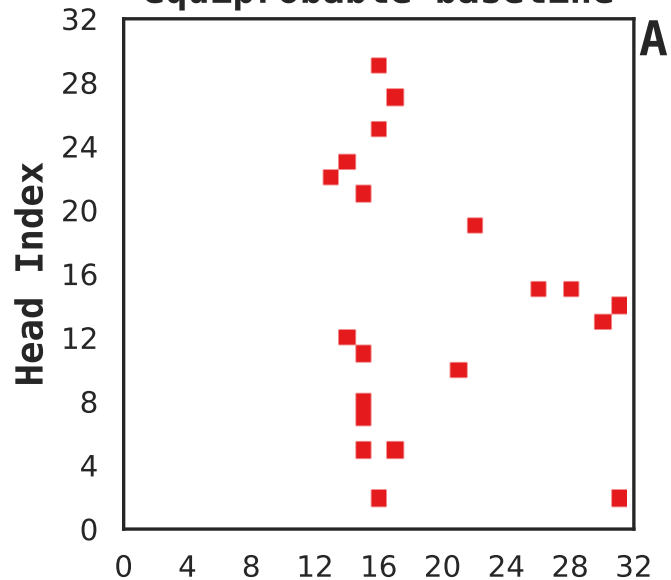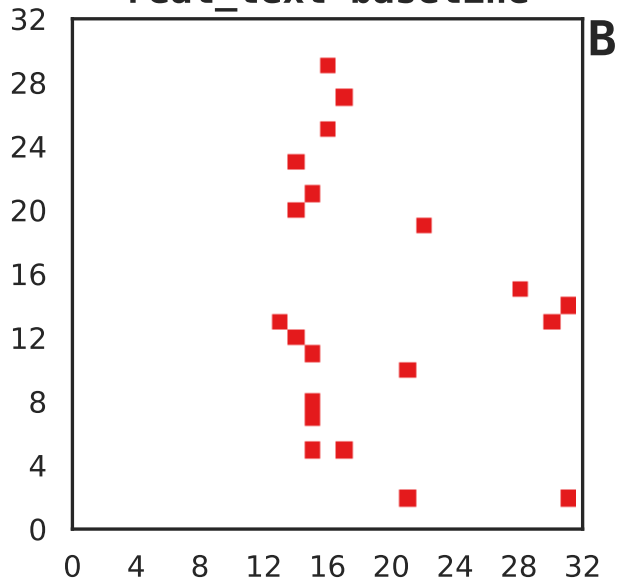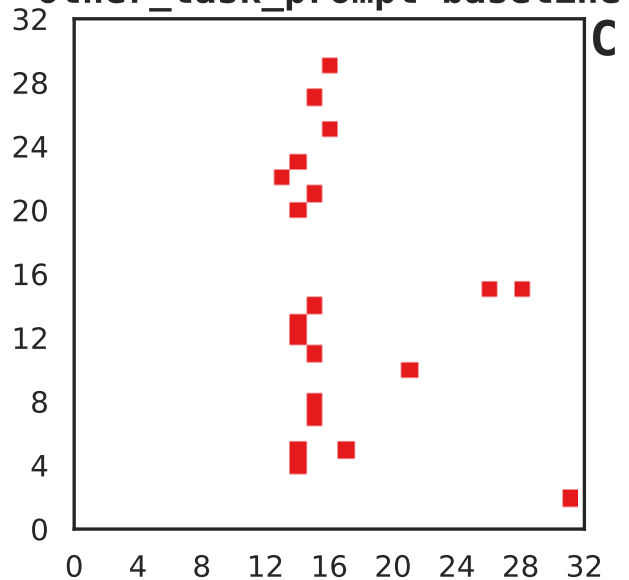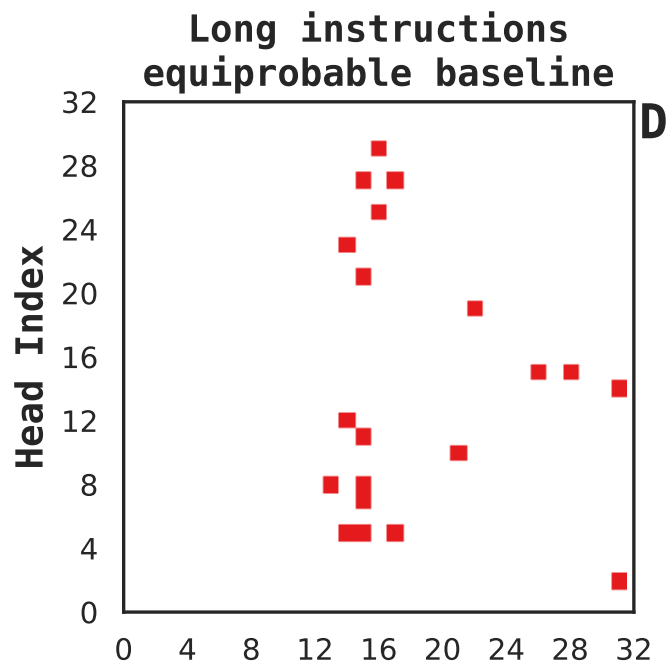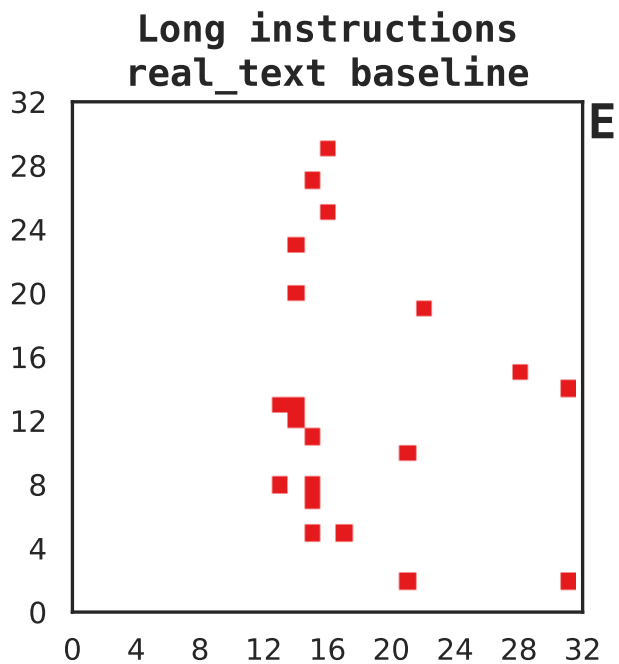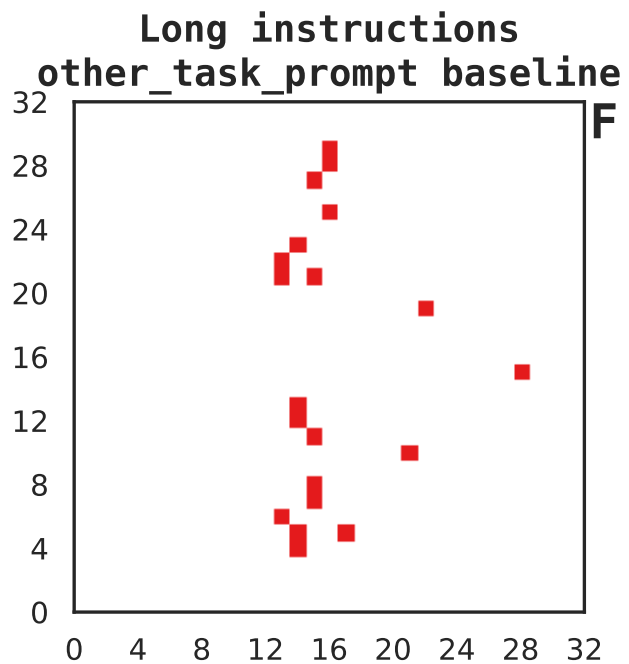

Supplement: supplementary_material [file appendix_finding_3_split_top_heads_Llama-3.1-8B.pdf › 5256_supplementary_code/notebooks/figures/appendix_finding_3_split_top_heads_Llama-3.1-8B.pdf]
