# Supplementary material
Source: ML conference proceedings conference paper supplement (https://openreview.net/forum?id=fy5InEg0OL)

# Llama-3.2-3B-Instruct

Short instructions  
equiprobable baseline

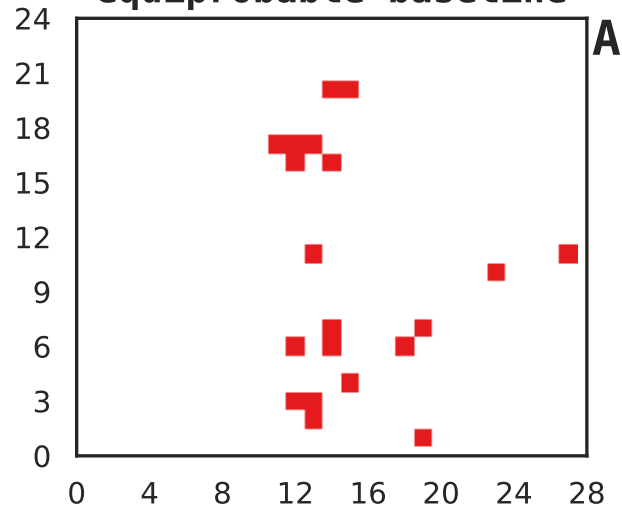

Short instructions  
real\_text baseline

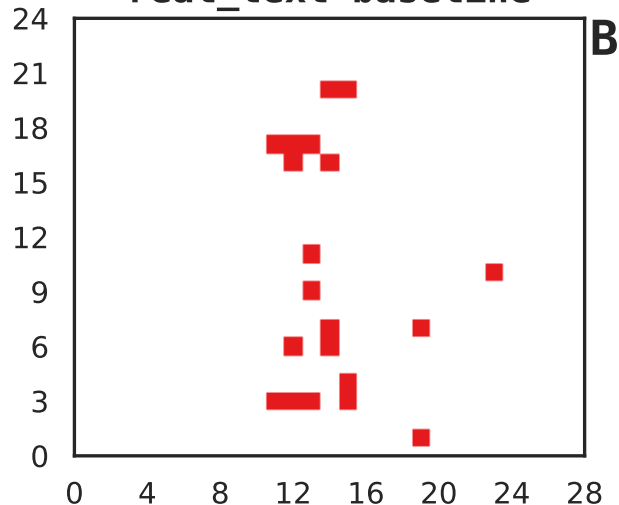

Short instructions  
other\_task\_prompt baseline

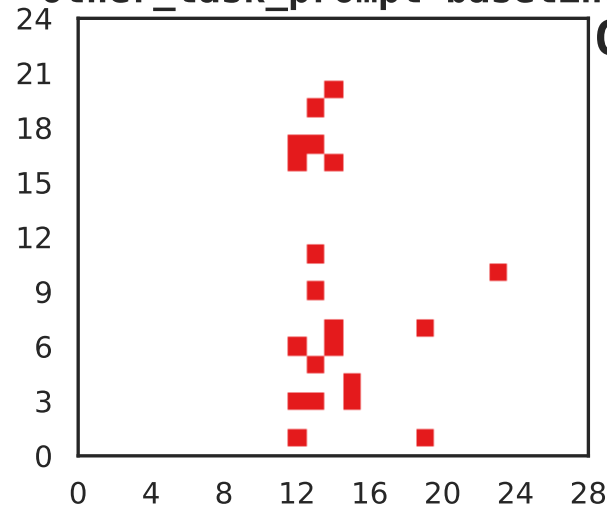

Long instructions  
equiprobable baseline

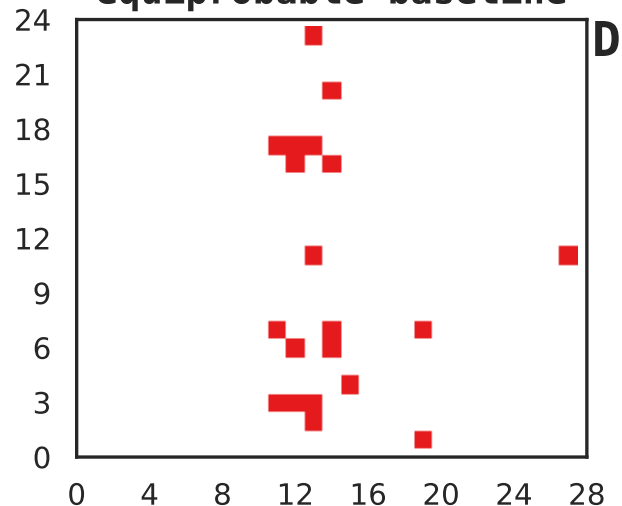

Long instructions  
real\_text baseline

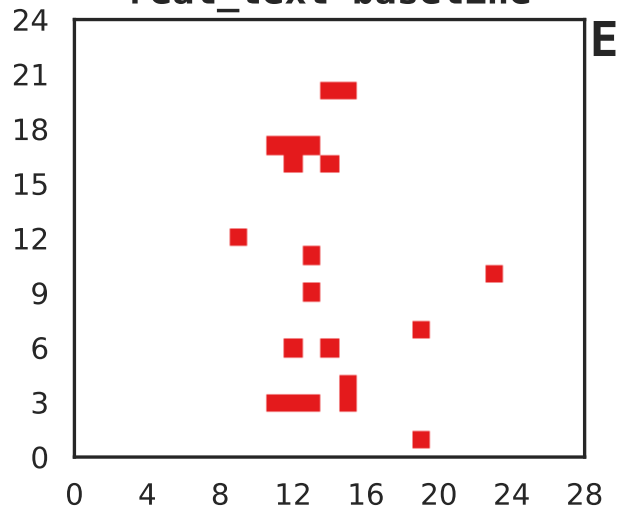

Long instructions  
other\_task\_prompt baseline

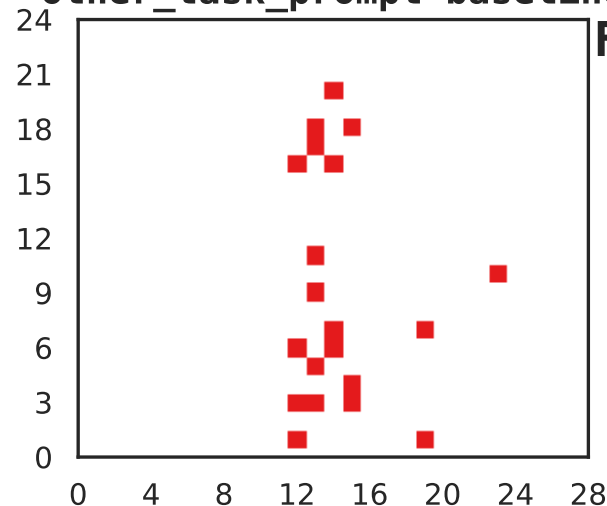

Supplement: supplementary_material [file appendix_finding_3_split_top_heads_Llama-3.2-3B-Instruct.pdf › 5256_supplementary_code/notebooks/figures/appendix_finding_3_split_top_heads_Llama-3.2-3B-Instruct.pdf]
