# Supplementary material
Source: ML conference proceedings conference paper supplement (https://openreview.net/forum?id=fy5InEg0OL)

**Llama-3.2-3B**  
20 top heads, 0 shared

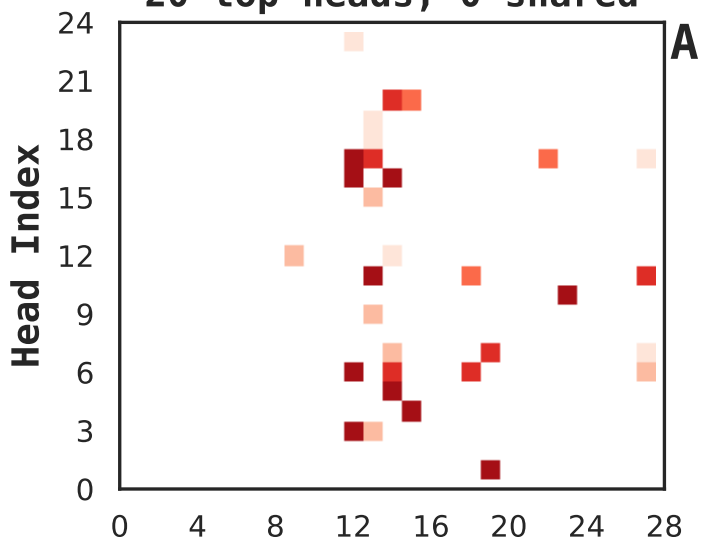

**Llama-3.2-3B-Instruct**  
20 top heads, 2 shared

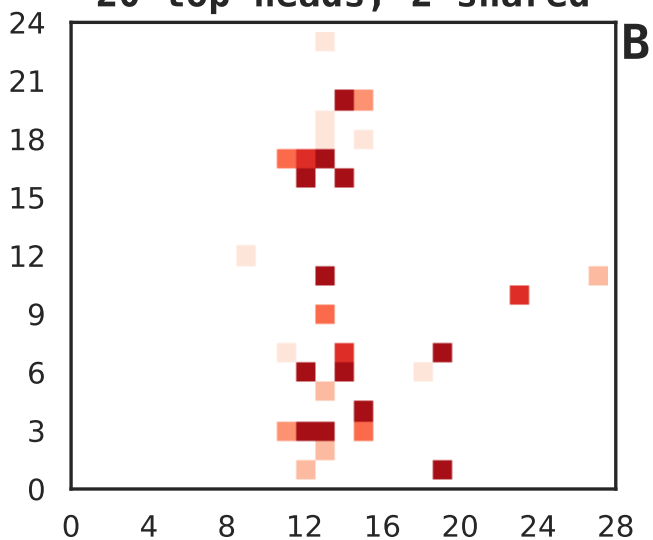

**Llama-3.1-8B**  
20 top heads, 6 shared

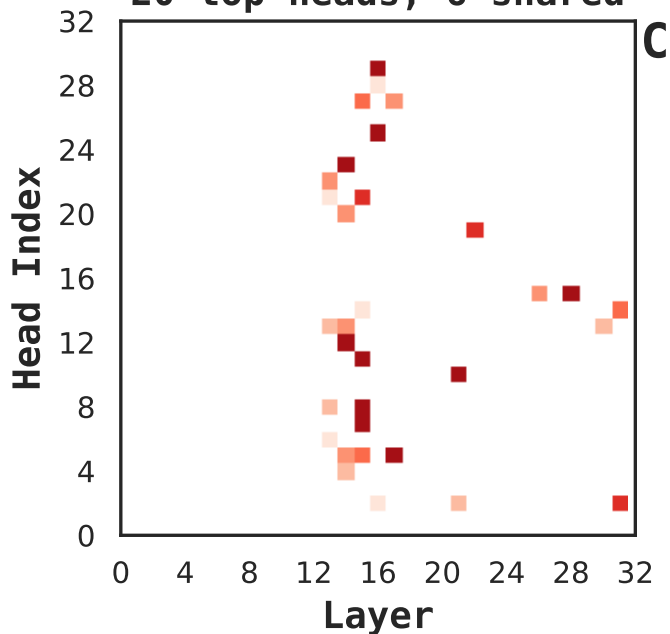

**Llama-3.1-8B-Instruct**  
20 top heads, 0 shared

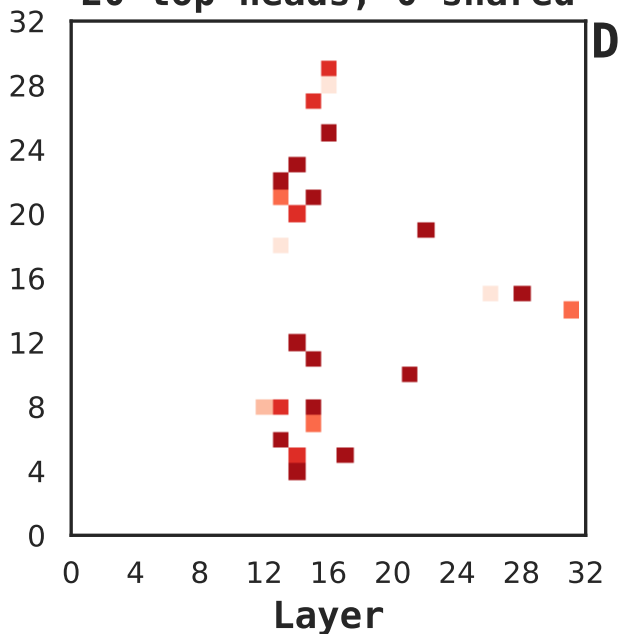

Supplement: supplementary_material [file appendix_finding_3_top_heads_heatmap.pdf › 5256_supplementary_code/notebooks/figures/appendix_finding_3_top_heads_heatmap.pdf]
