# Supplementary material
Source: ML conference proceedings conference paper supplement (https://openreview.net/forum?id=fy5InEg0OL)
Supplement: supplementary_material [file finding_3_shared_top_heads.pdf › 5256_supplementary_code/notebooks/figures/finding_3_shared_top_heads.pdf]

**Llama-3.2-3B**  
20 top heads, 7 shared

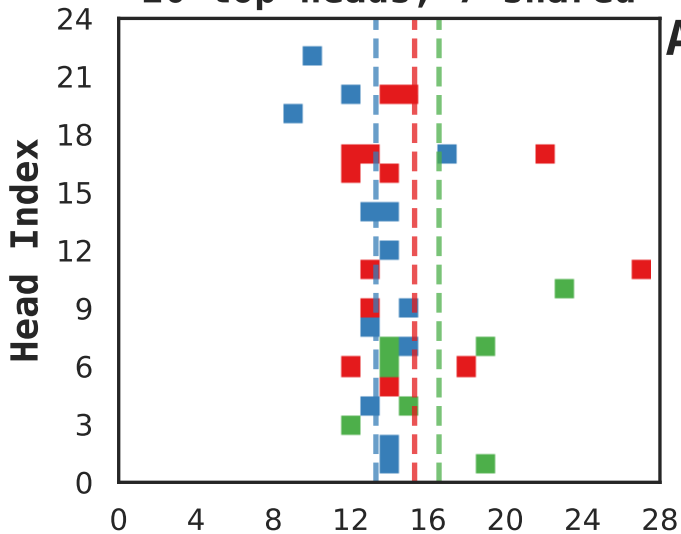

**Llama-3.2-3B-Instruct**  
20 top heads, 7 shared

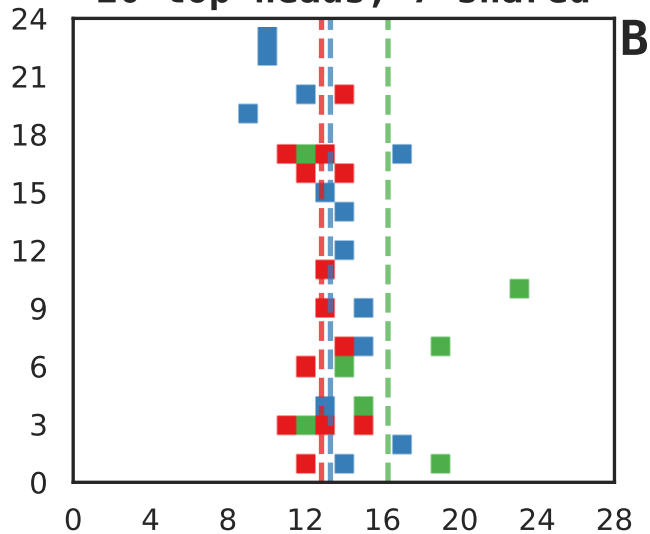

**Llama-3.1-8B**  
20 top heads, 4 shared

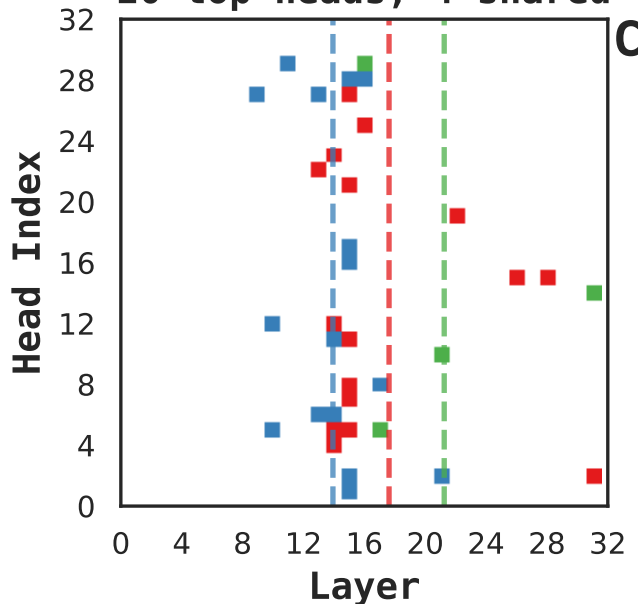

**Llama-3.1-8B-Instruct**  
20 top heads, 4 shared

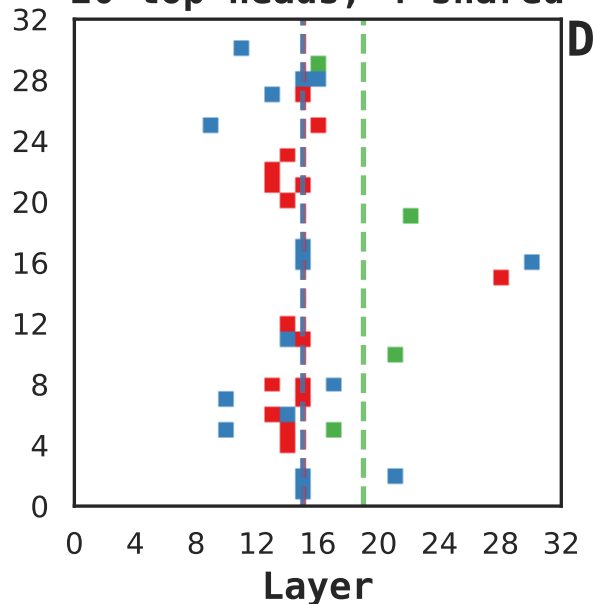

■ Instruction only    ■ Demonstration only    ■ Shared
