# Supplementary material
Source: ML conference proceedings conference paper supplement (https://openreview.net/forum?id=fy5InEg0OL)

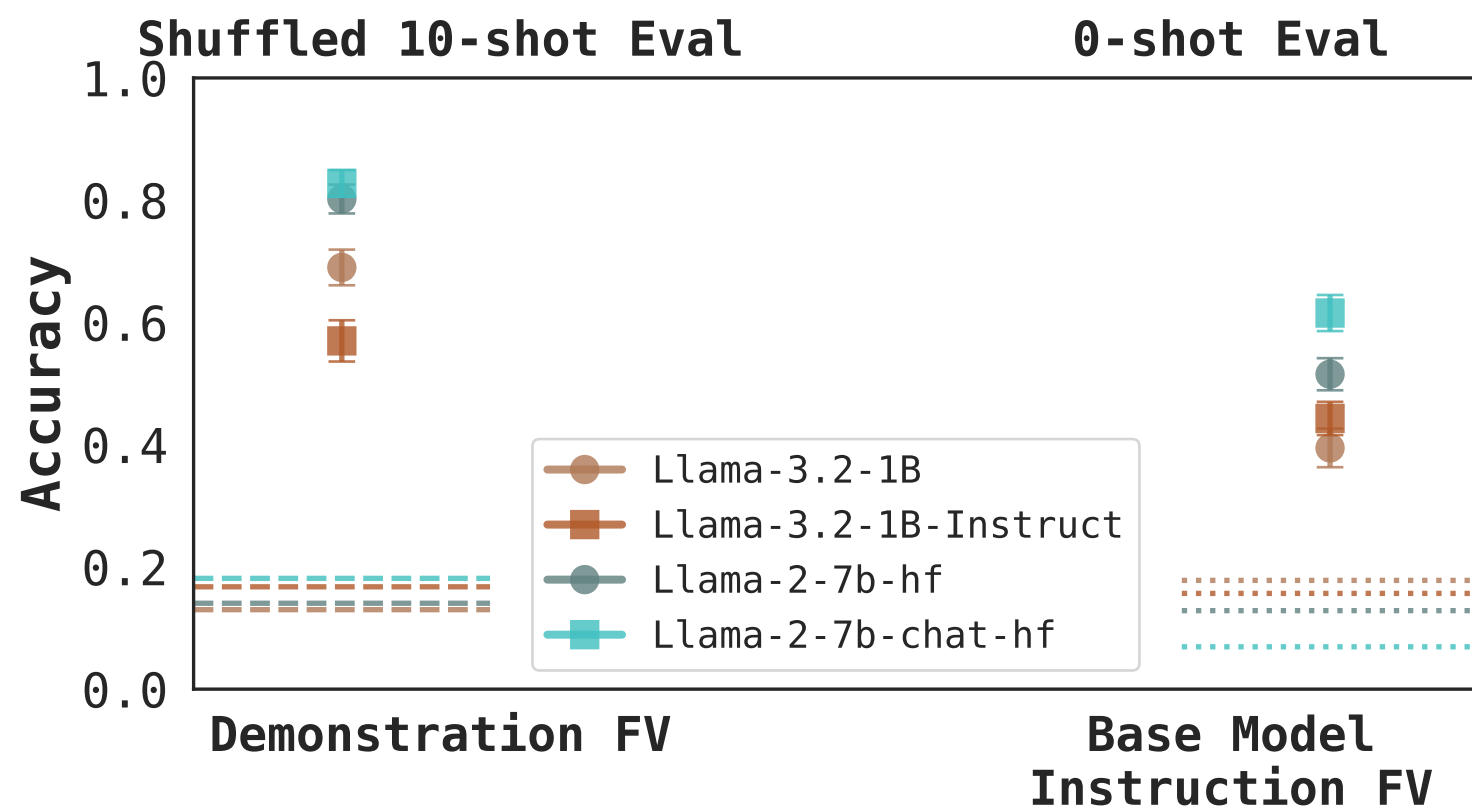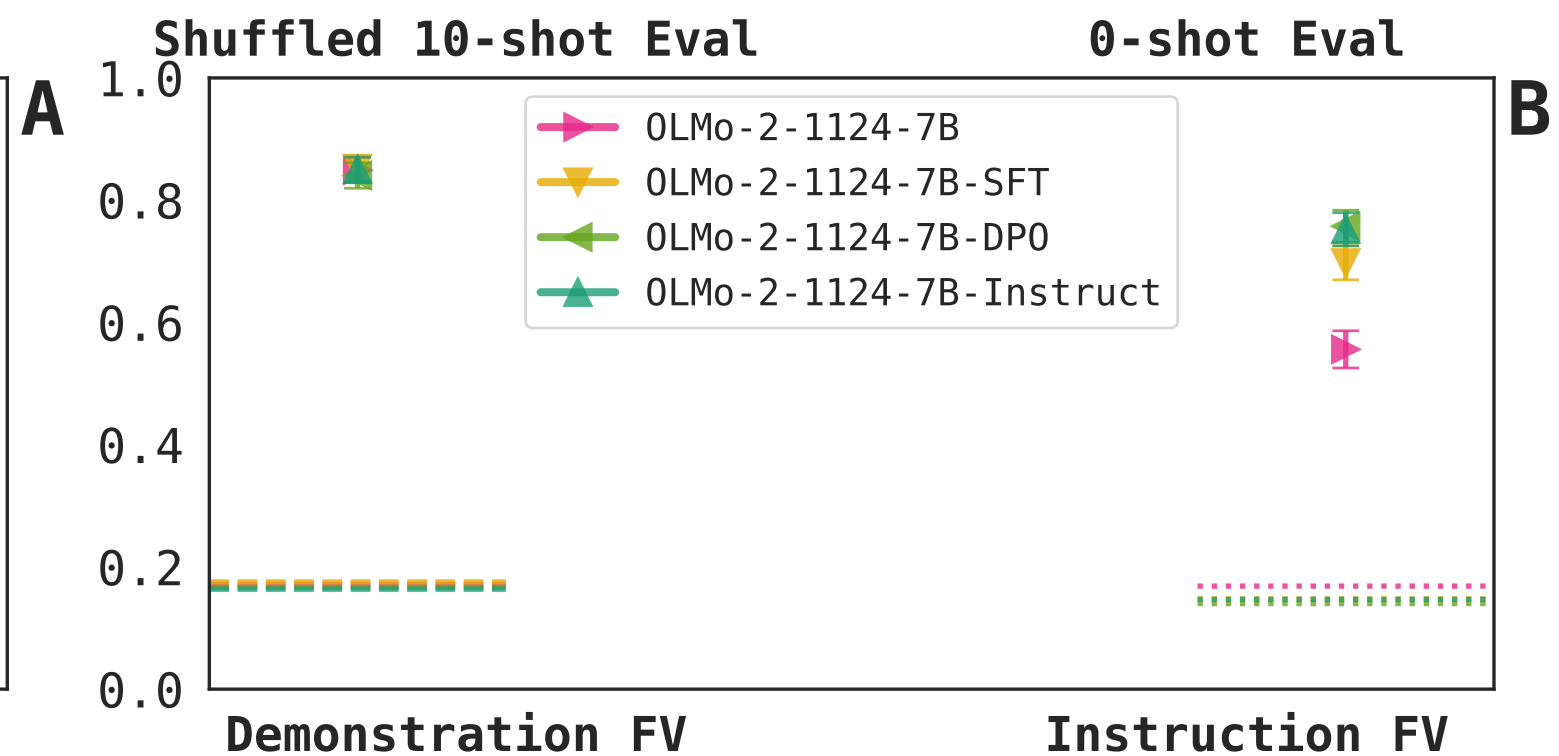

Supplement: supplementary_material [file appendix_finding_1_more_models_matched_evals_one_third_layer.pdf › 5256_supplementary_code/notebooks/figures/appendix_finding_1_more_models_matched_evals_one_third_layer.pdf]

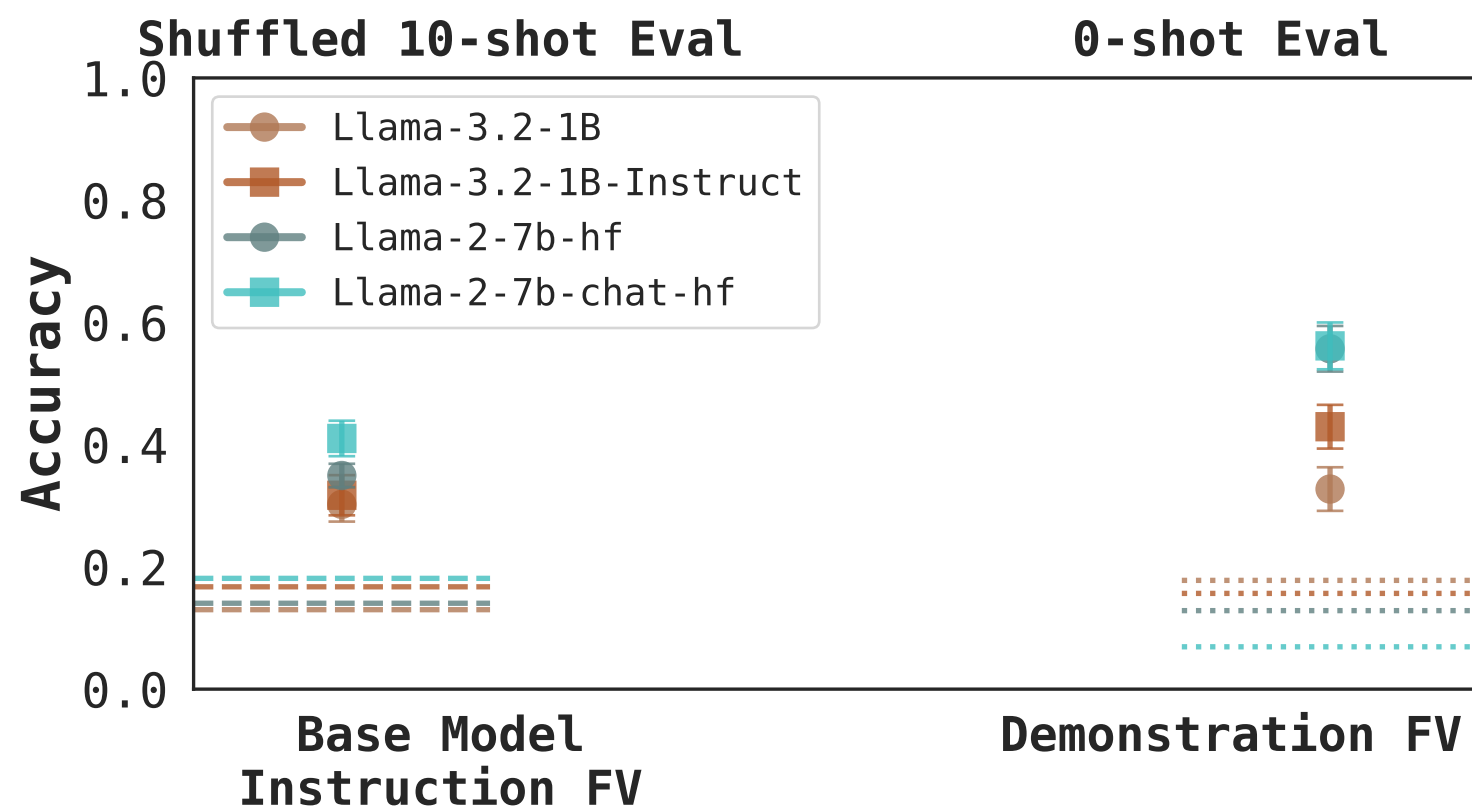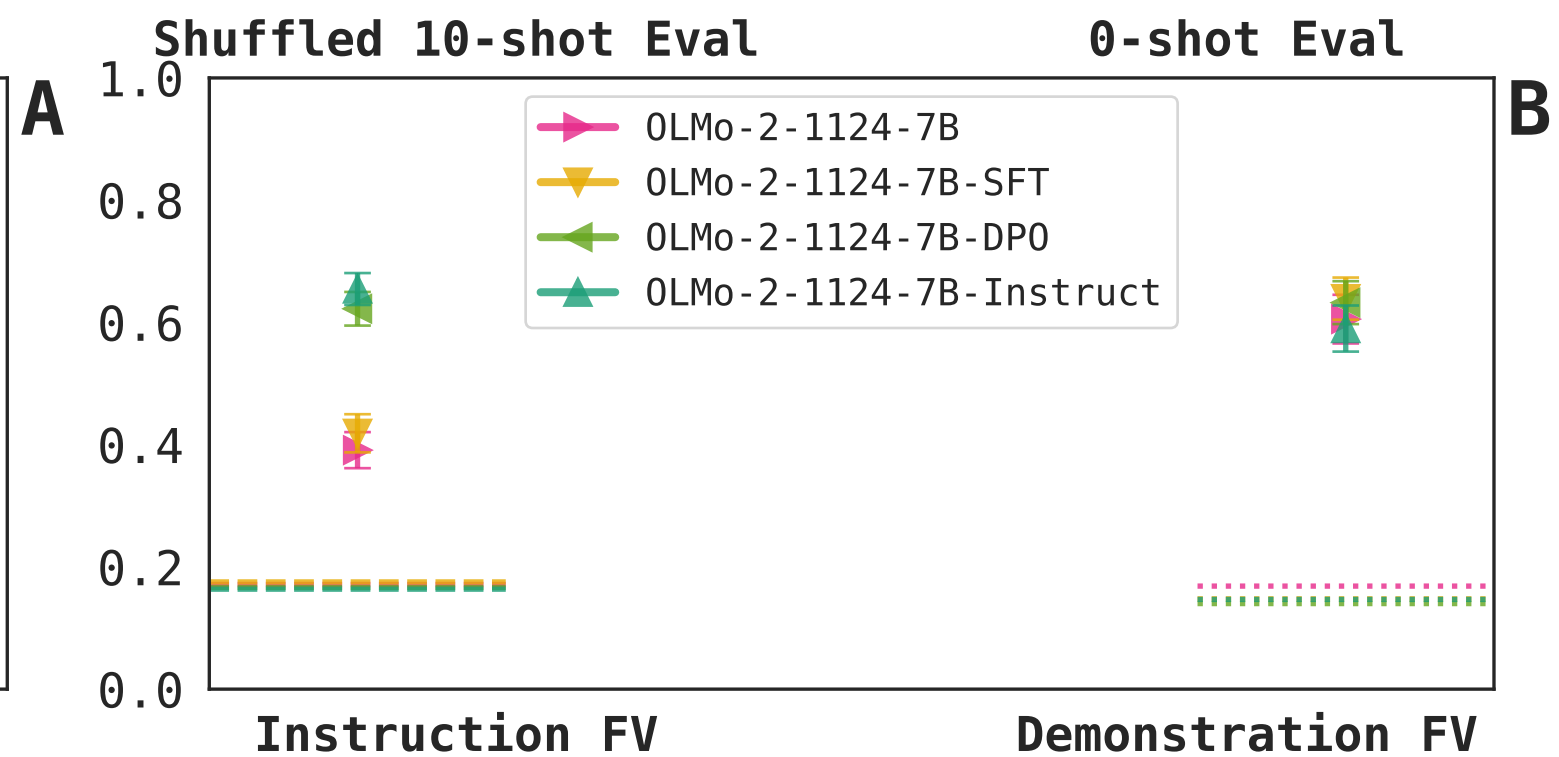

Supplement: supplementary_material [file appendix_finding_1_more_models_unmatched_evals_one_third_layer.pdf › 5256_supplementary_code/notebooks/figures/appendix_finding_1_more_models_unmatched_evals_one_third_layer.pdf]

Shuffled 10-shot Eval

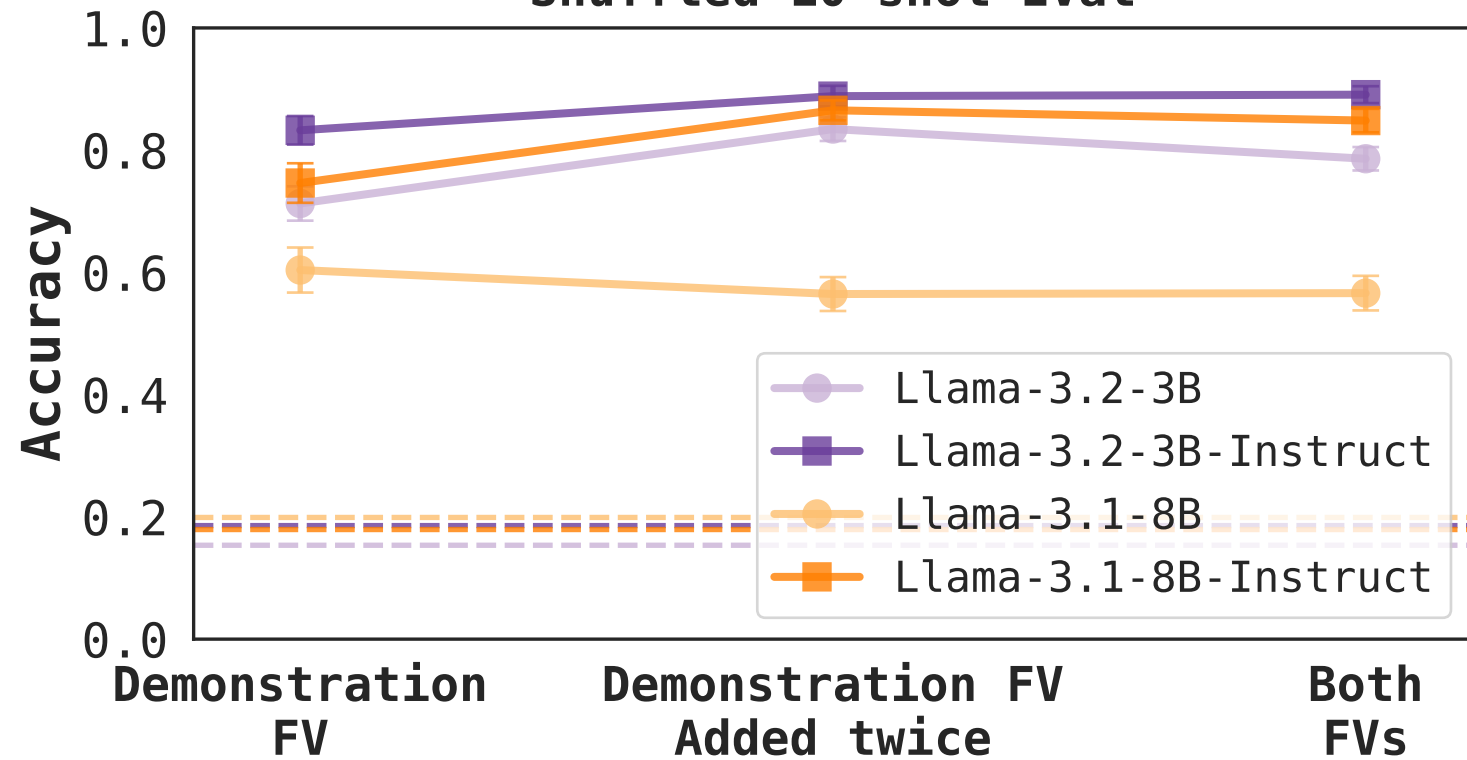

0-shot Eval

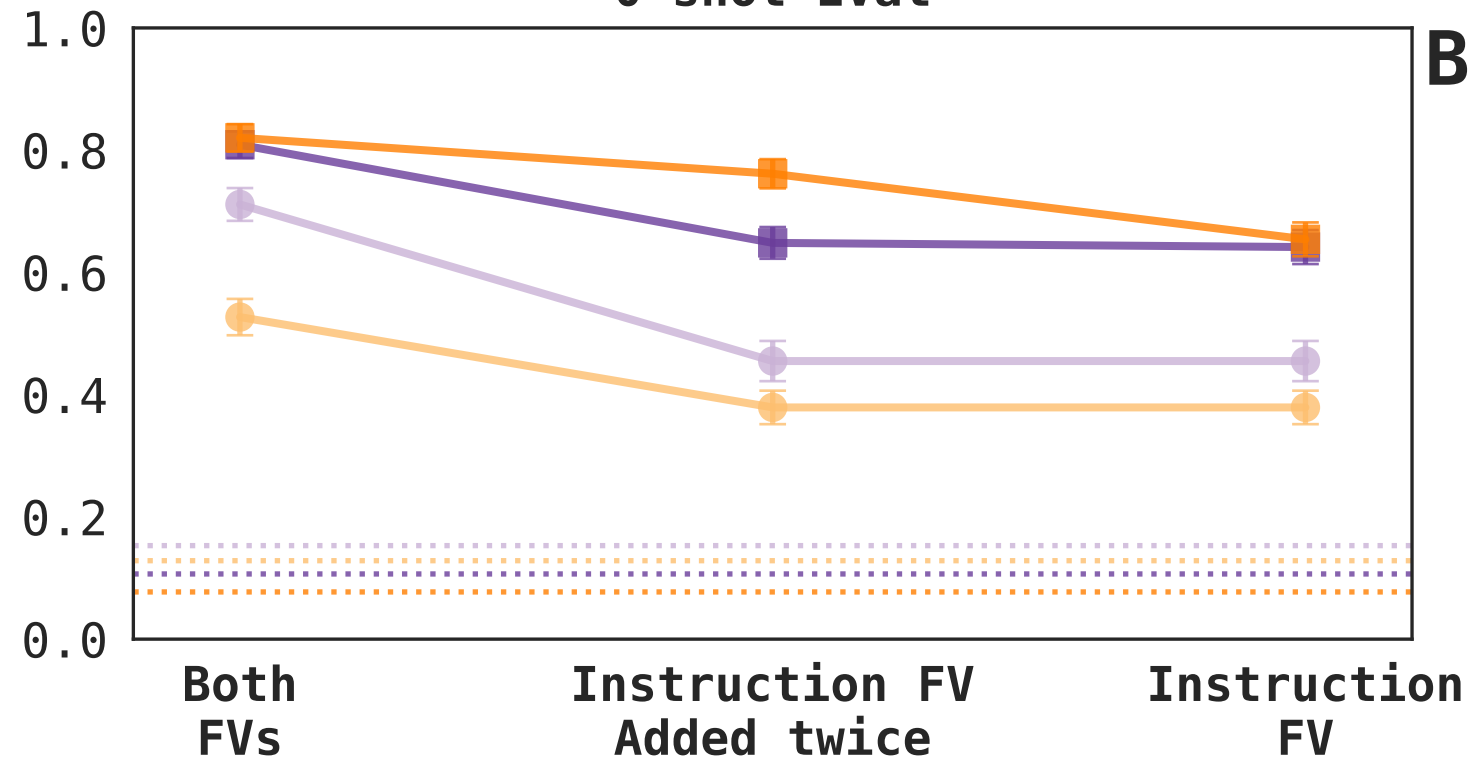

Supplement: supplementary_material [file appendix_finding_2_fv_twice_control_matched_evals_max_acc_layer.pdf › 5256_supplementary_code/notebooks/figures/appendix_finding_2_fv_twice_control_matched_evals_max_acc_layer.pdf]

Shuffled 10-shot Eval

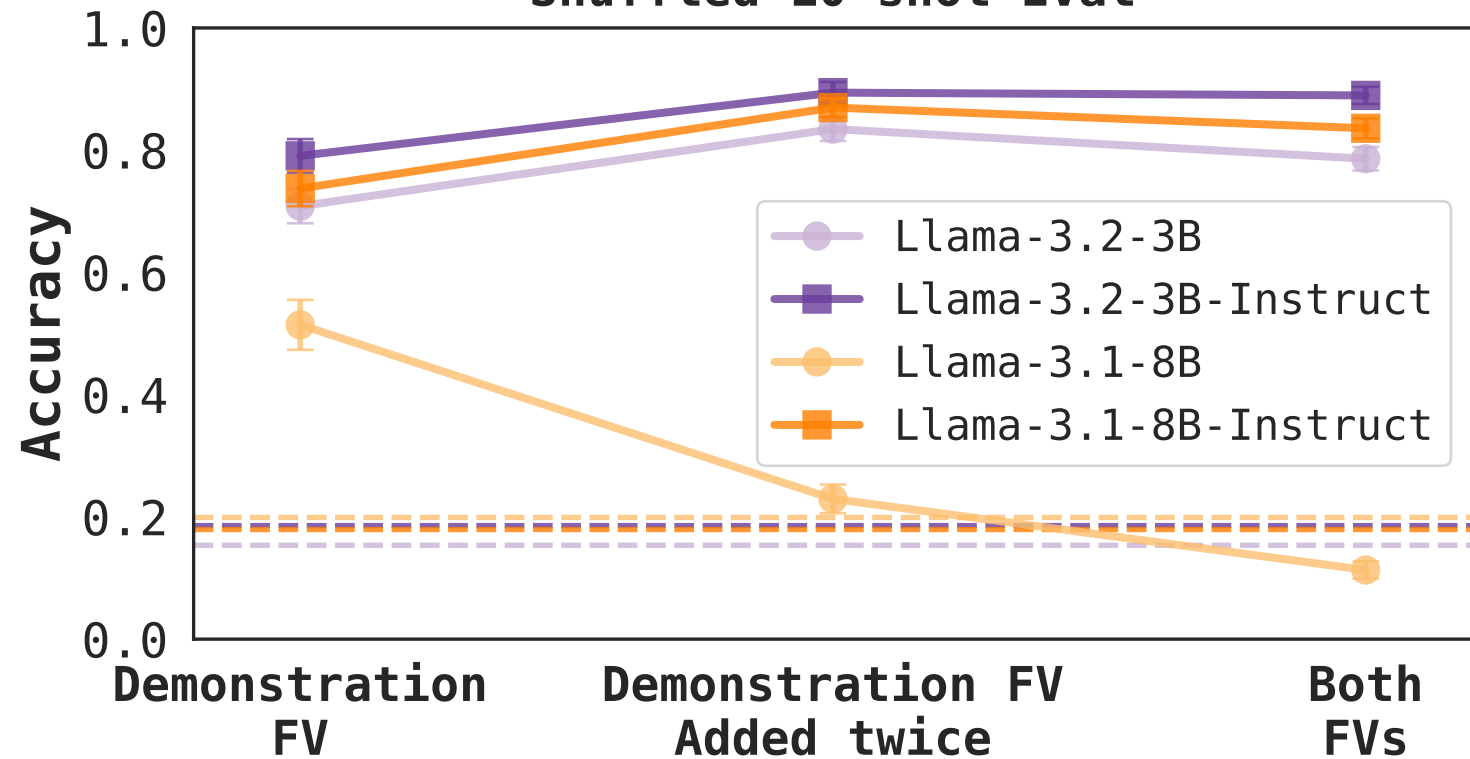

0-shot Eval

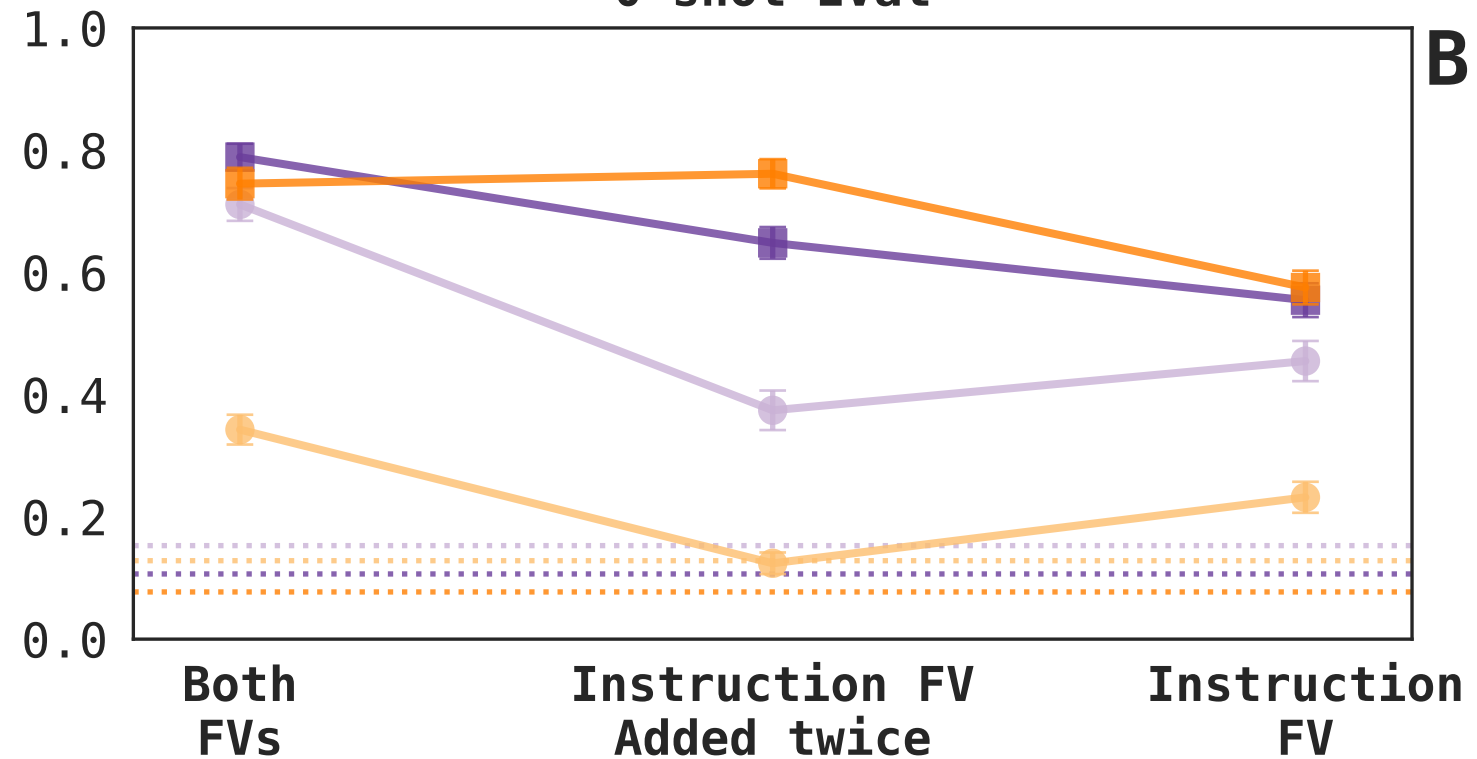

Supplement: supplementary_material [file appendix_finding_2_fv_twice_control_matched_evals_one_third_layer.pdf › 5256_supplementary_code/notebooks/figures/appendix_finding_2_fv_twice_control_matched_evals_one_third_layer.pdf]

0-shot Eval

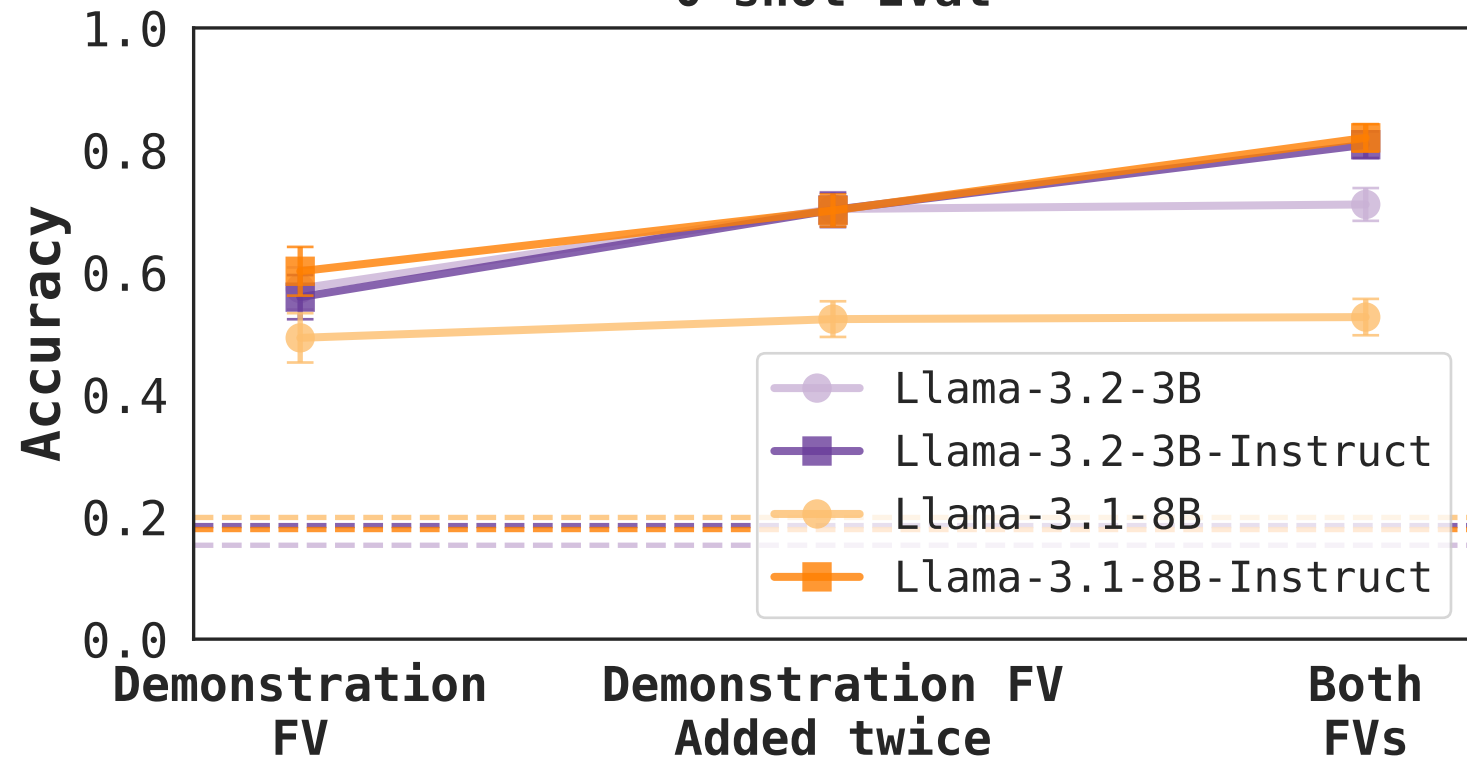

Shuffled 10-shot Eval

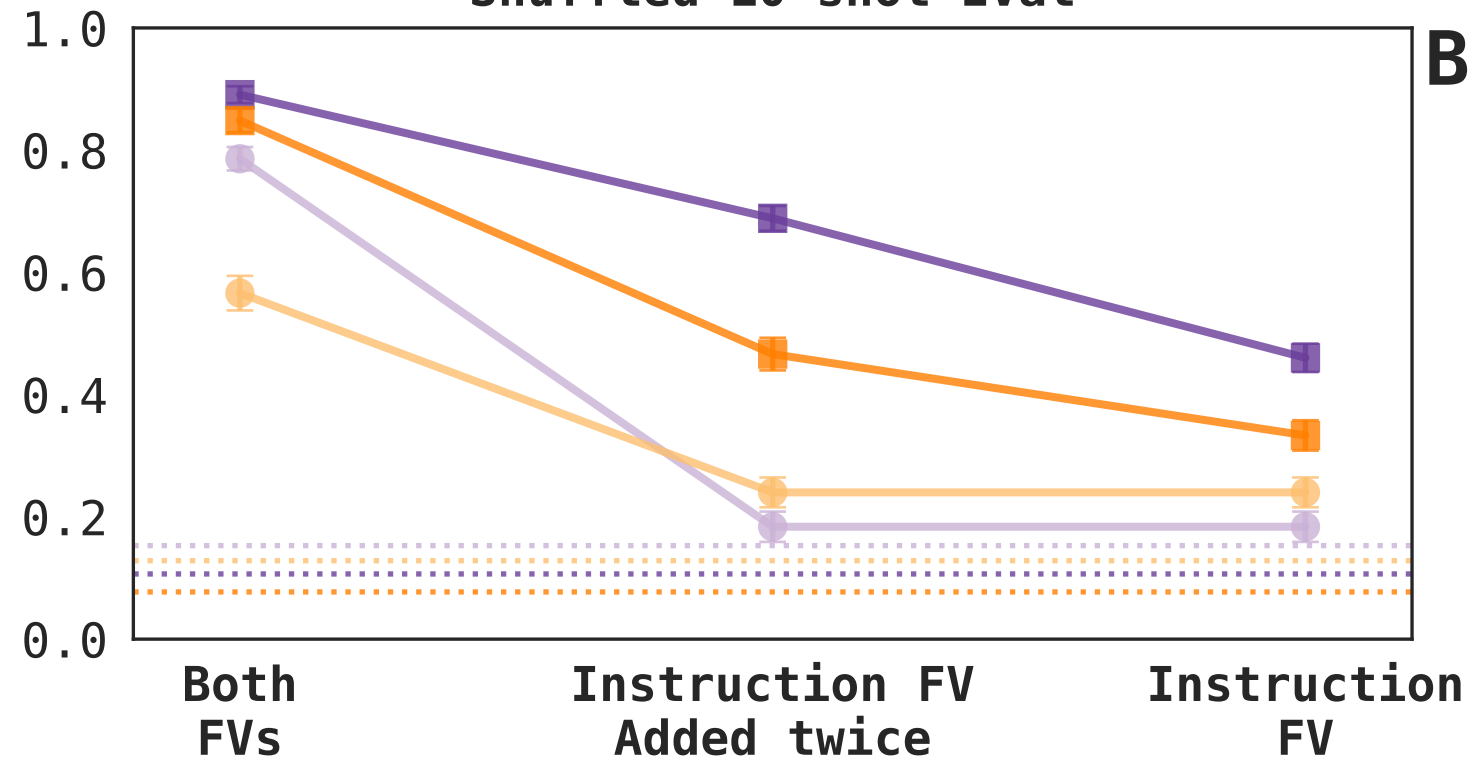

Supplement: supplementary_material [file appendix_finding_2_fv_twice_control_unmatched_evals_max_acc_layer.pdf › 5256_supplementary_code/notebooks/figures/appendix_finding_2_fv_twice_control_unmatched_evals_max_acc_layer.pdf]

0-shot Eval

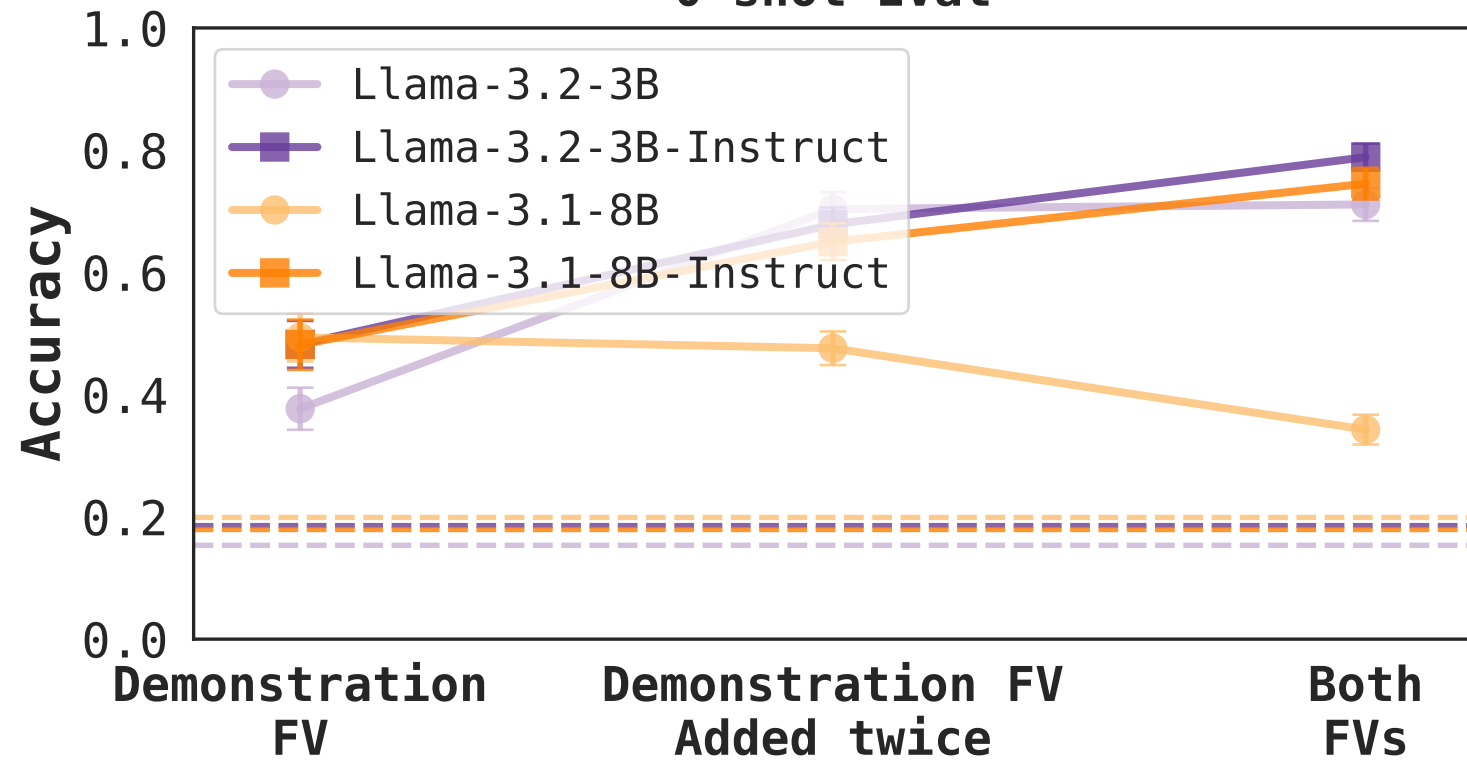

Shuffled 10-shot Eval

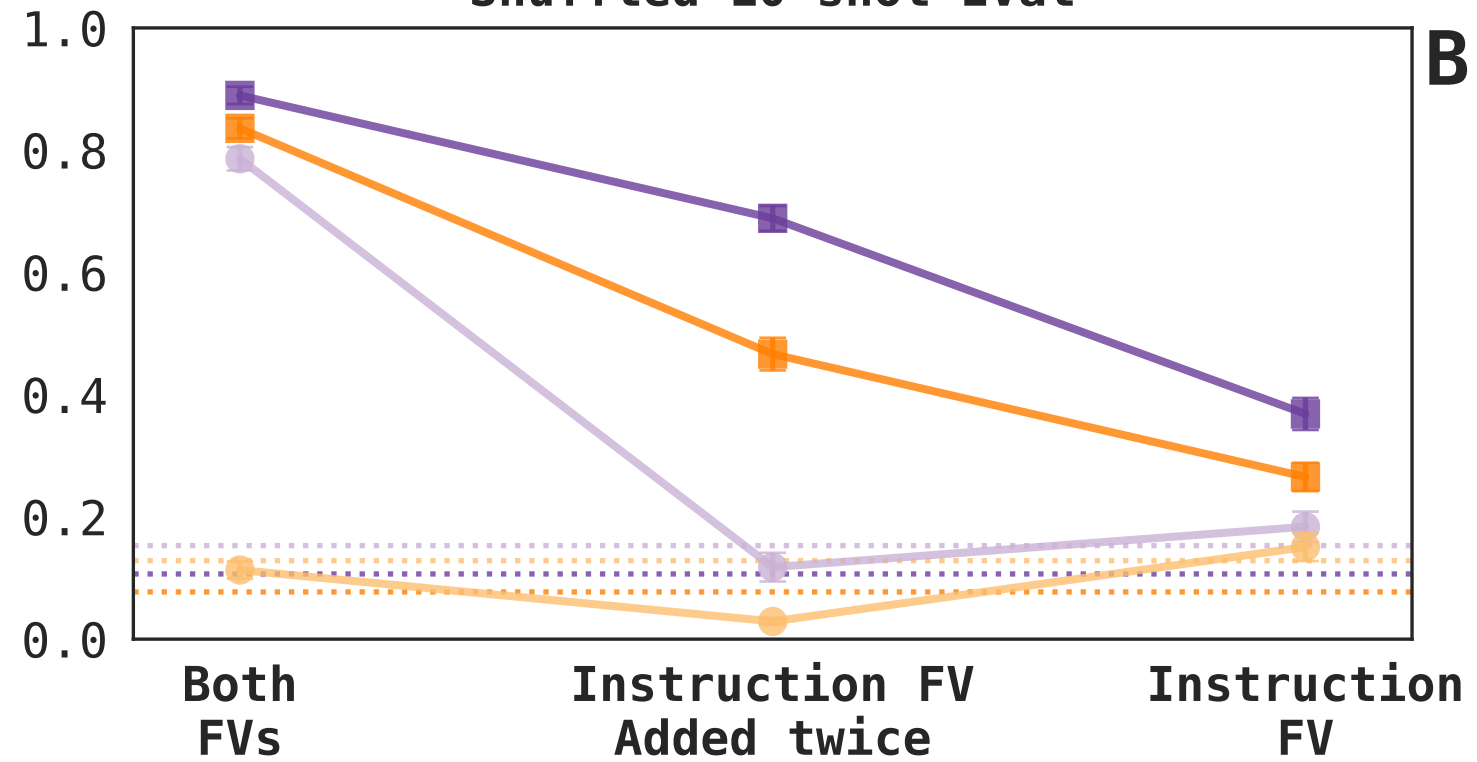

Supplement: supplementary_material [file appendix_finding_2_fv_twice_control_unmatched_evals_one_third_layer.pdf › 5256_supplementary_code/notebooks/figures/appendix_finding_2_fv_twice_control_unmatched_evals_one_third_layer.pdf]

# Llama-3.2-1B Family

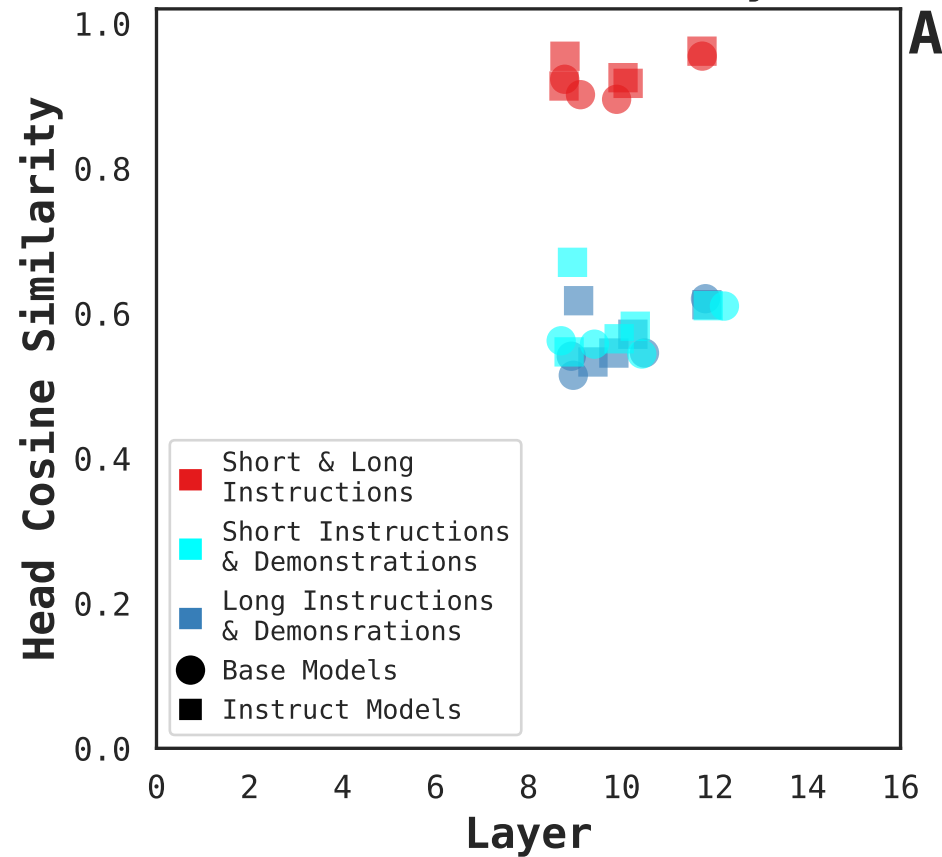

# Llama-2-7b-hf Family

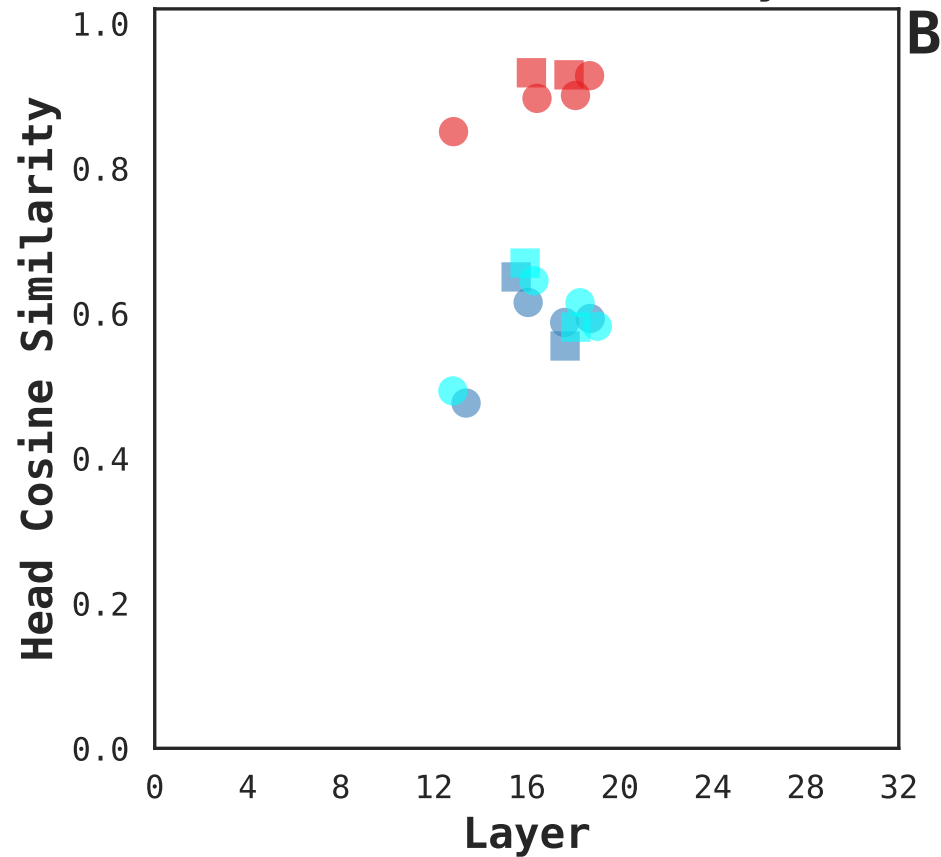

# OLMo-2-1124-7B Family

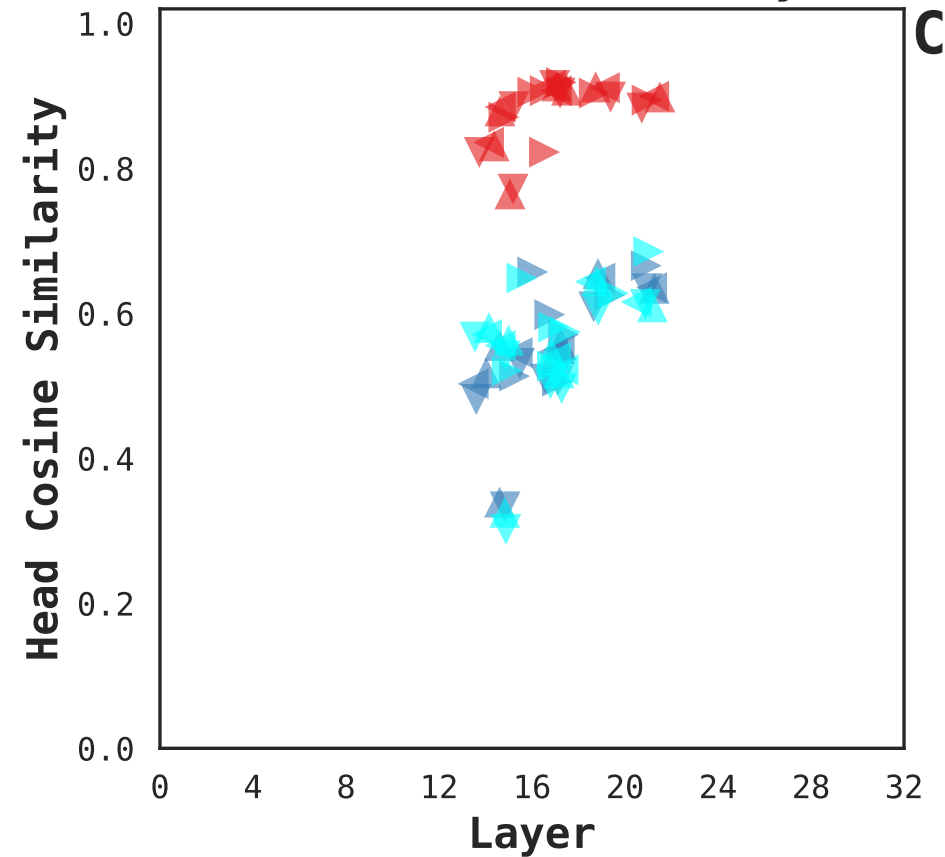

Supplement: supplementary_material [file appendix_finding_3_head_similarities.pdf › 5256_supplementary_code/notebooks/figures/appendix_finding_3_head_similarities.pdf]

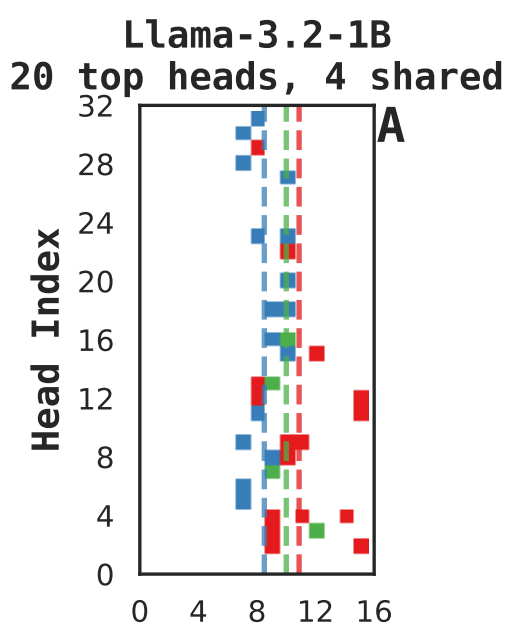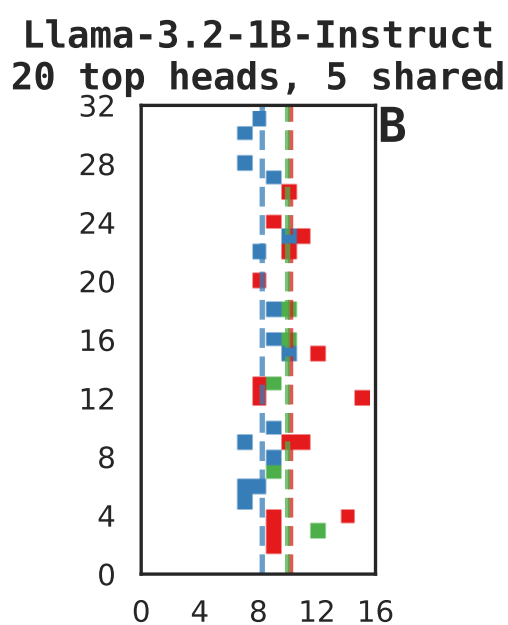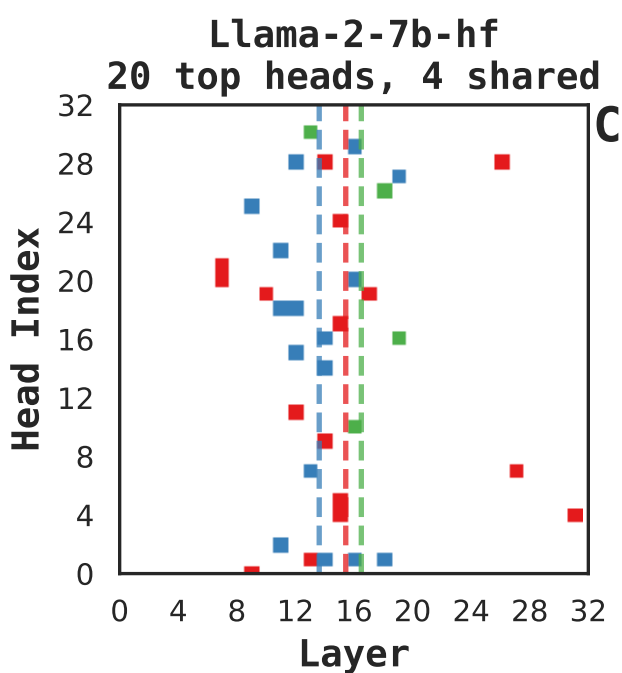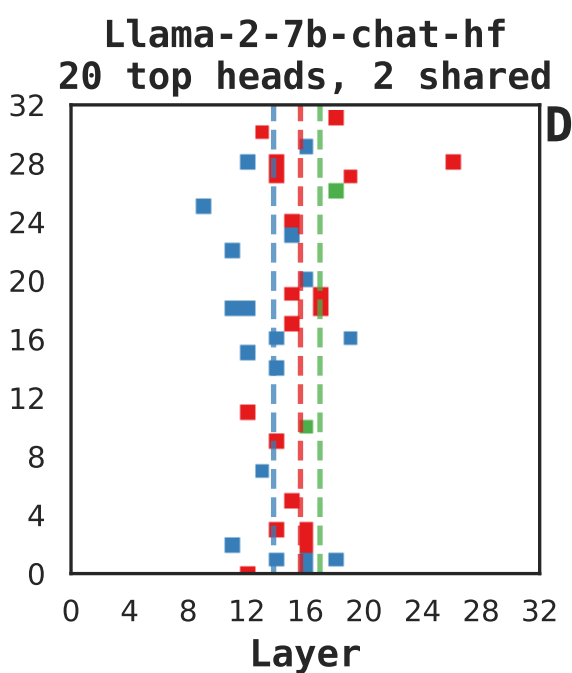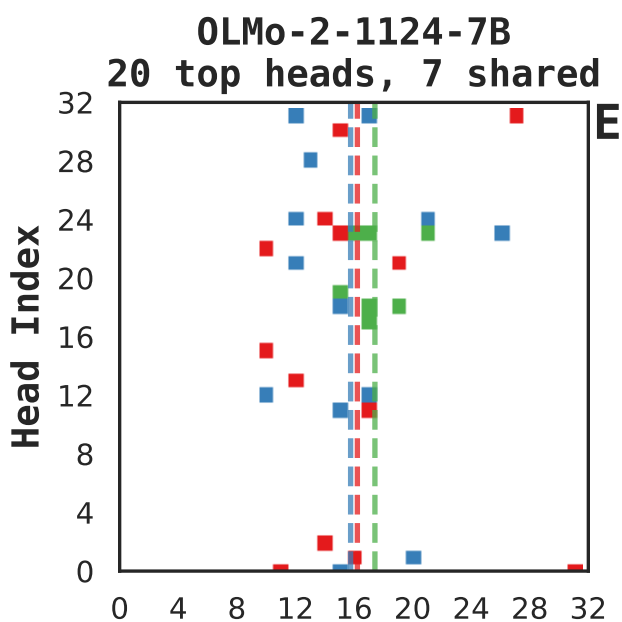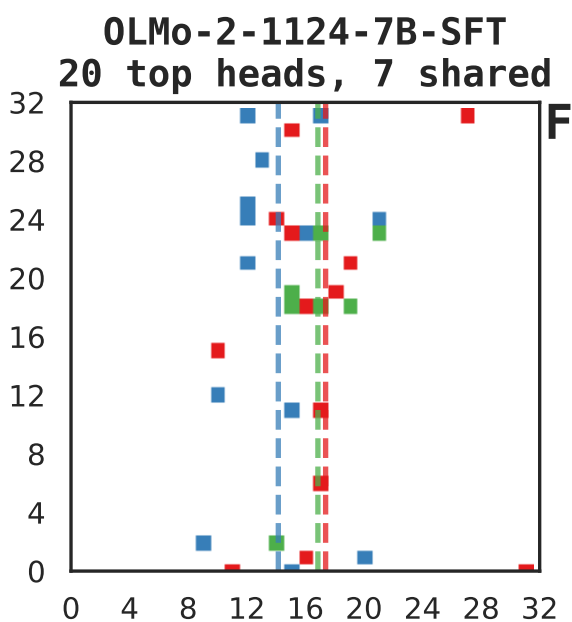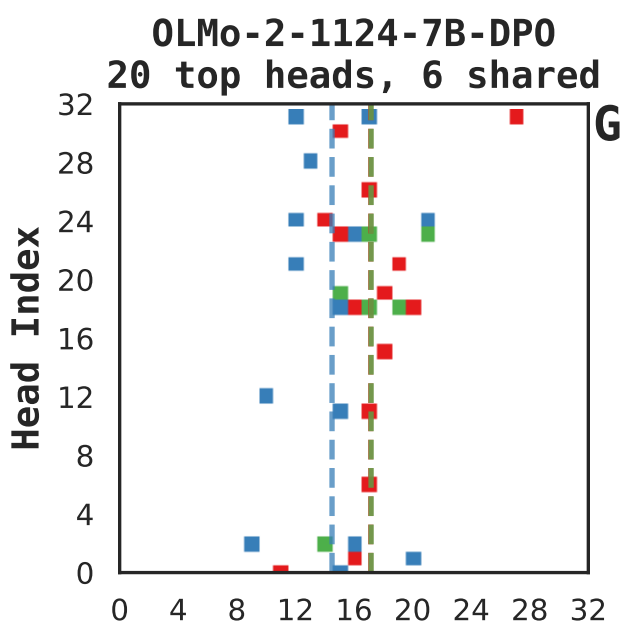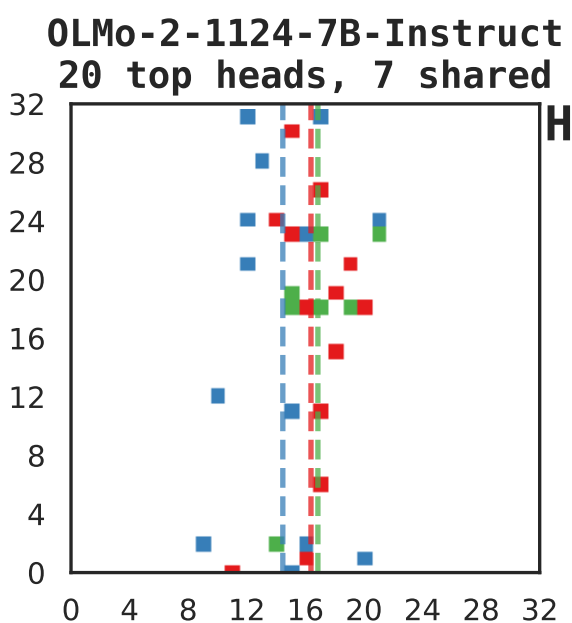

■ Instruction only    ■ Demonstration only    ■ Shared

Supplement: supplementary_material [file appendix_finding_3_shared_top_heads.pdf › 5256_supplementary_code/notebooks/figures/appendix_finding_3_shared_top_heads.pdf]

### Shuffled 10-shot Eval

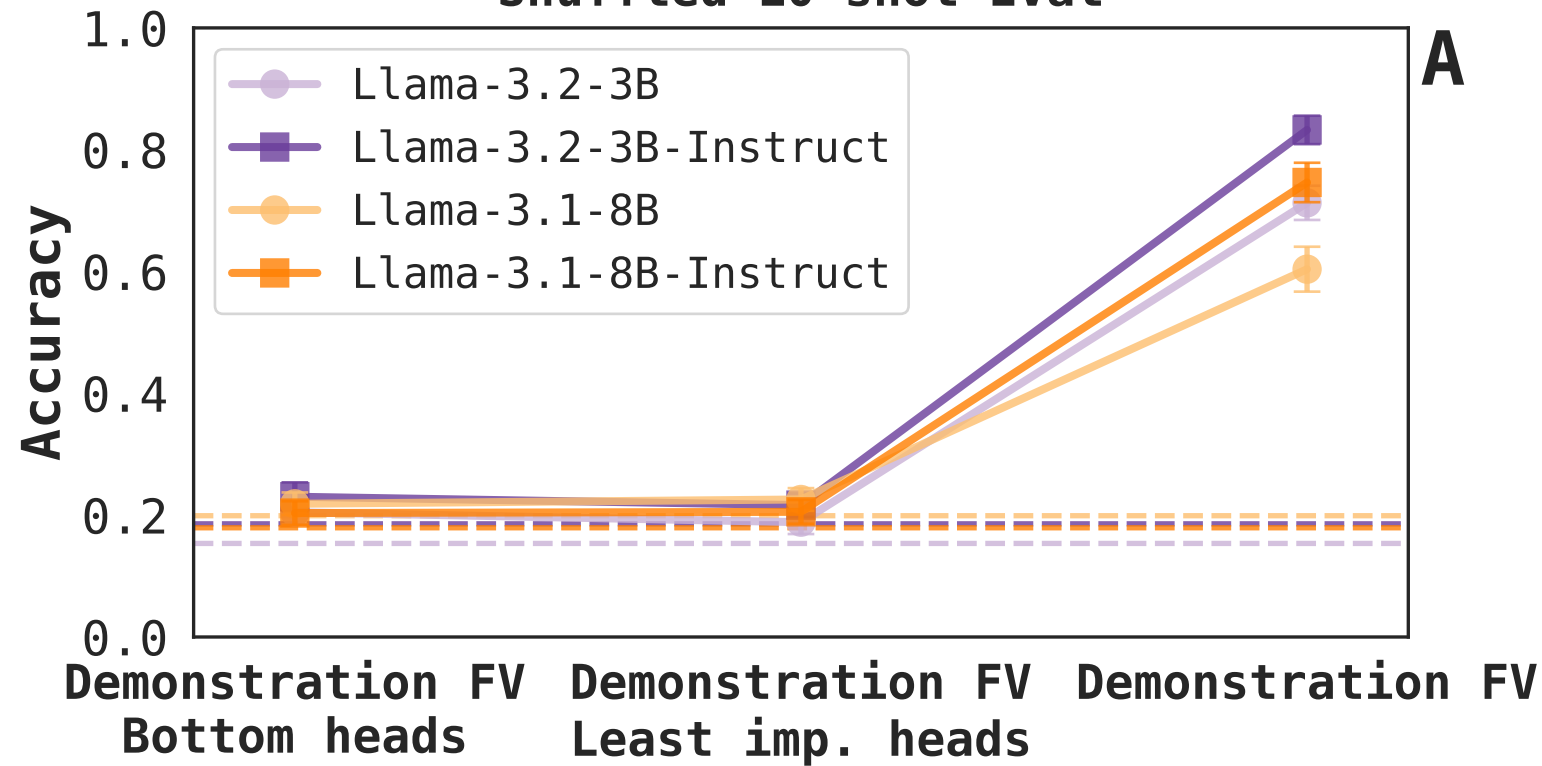

### 0-shot Eval

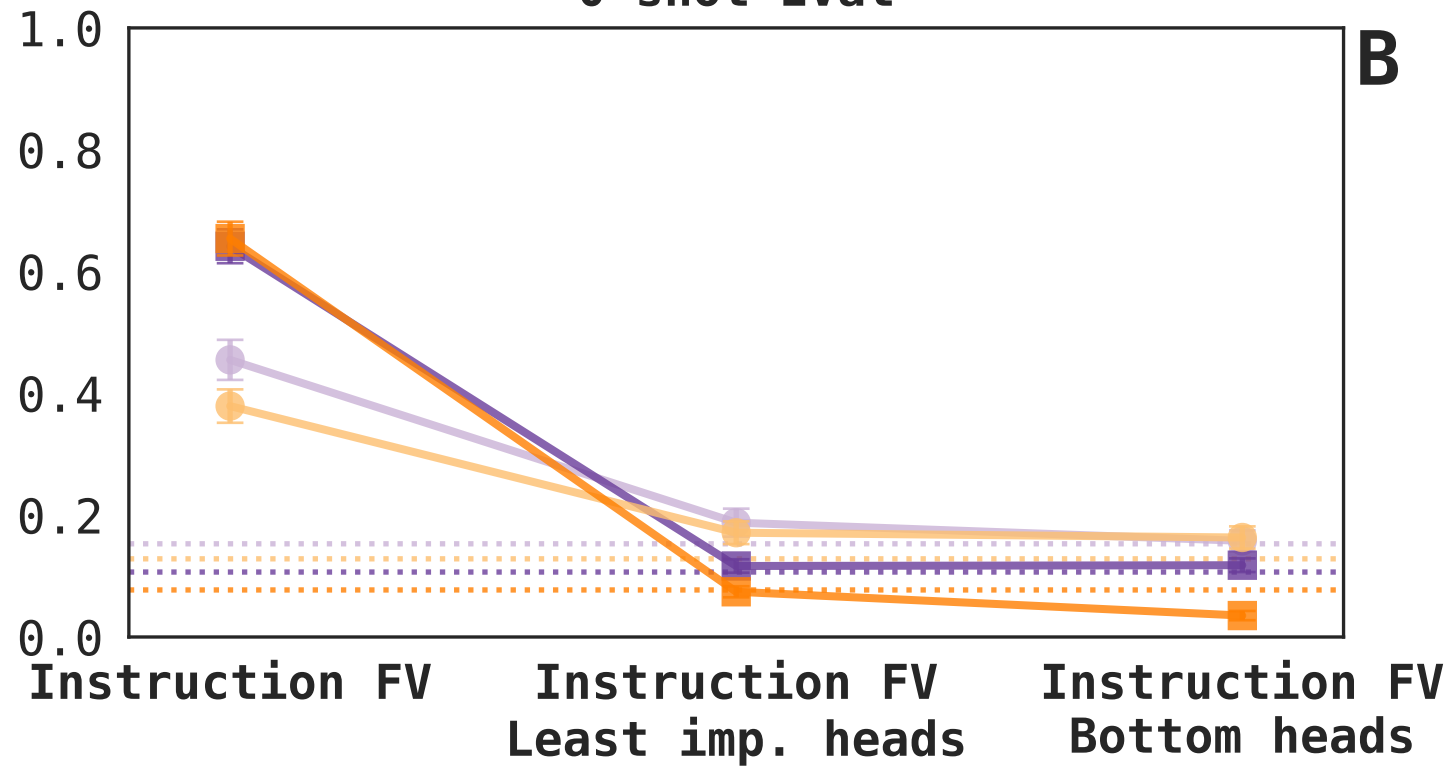

Supplement: supplementary_material [file appendix_finding_4_least_imp_bottom_control_matched_evals_max_acc_layer.pdf › 5256_supplementary_code/notebooks/figures/appendix_finding_4_least_imp_bottom_control_matched_evals_max_acc_layer.pdf]

### Shuffled 10-shot Eval

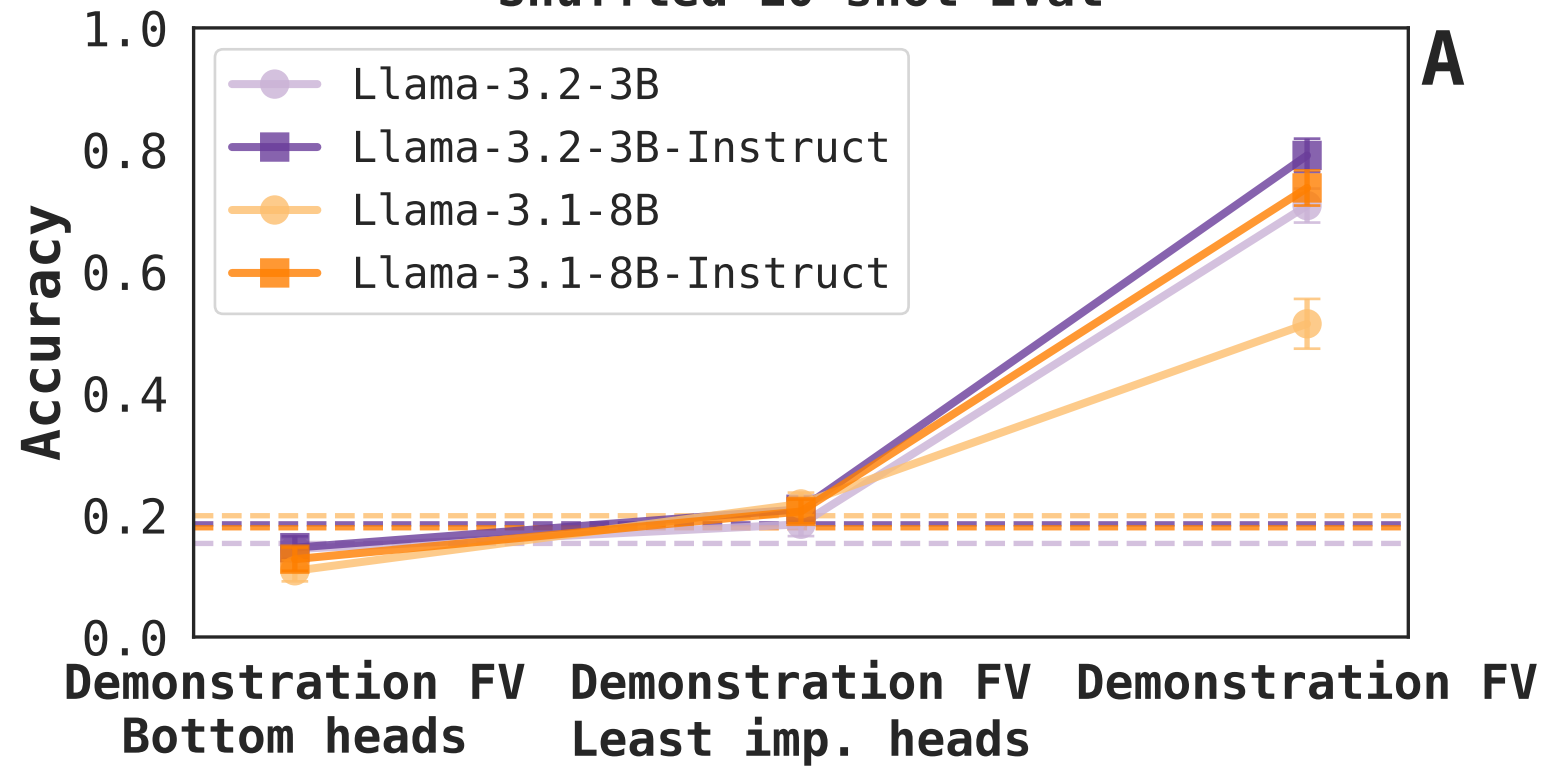

### 0-shot Eval

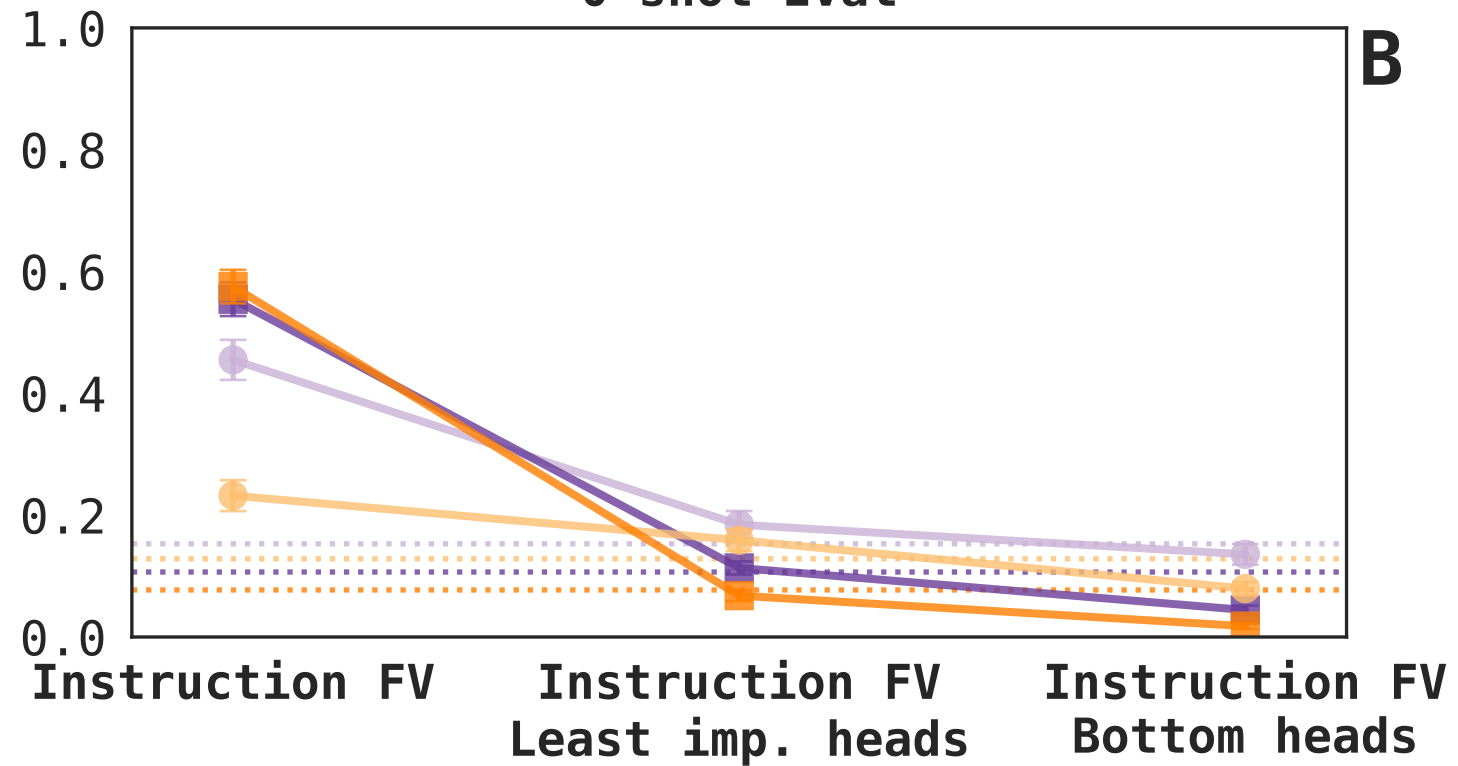

Supplement: supplementary_material [file appendix_finding_4_least_imp_bottom_control_matched_evals_one_third_layer.pdf › 5256_supplementary_code/notebooks/figures/appendix_finding_4_least_imp_bottom_control_matched_evals_one_third_layer.pdf]

0-shot Eval

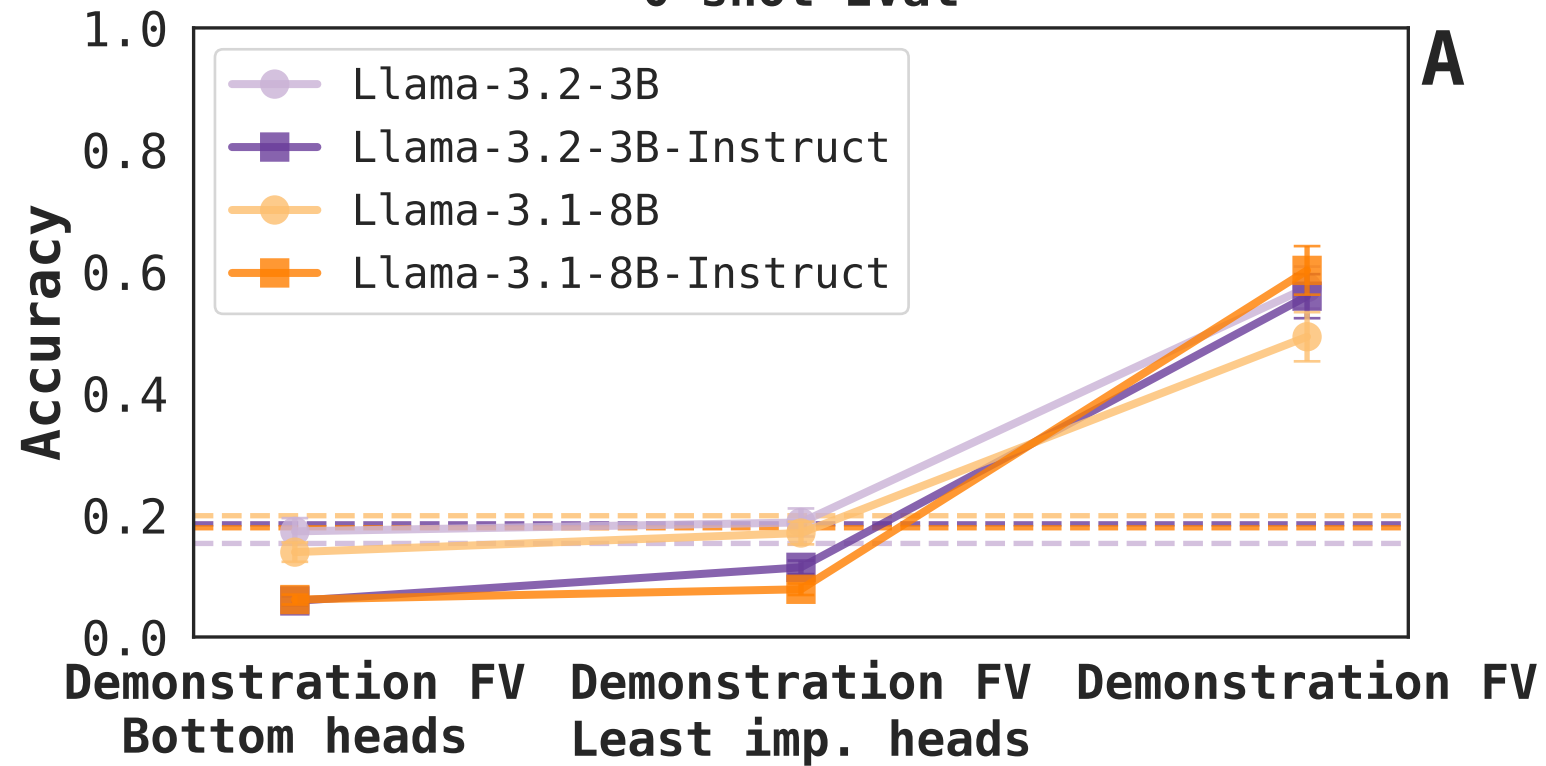

Shuffled 10-shot Eval

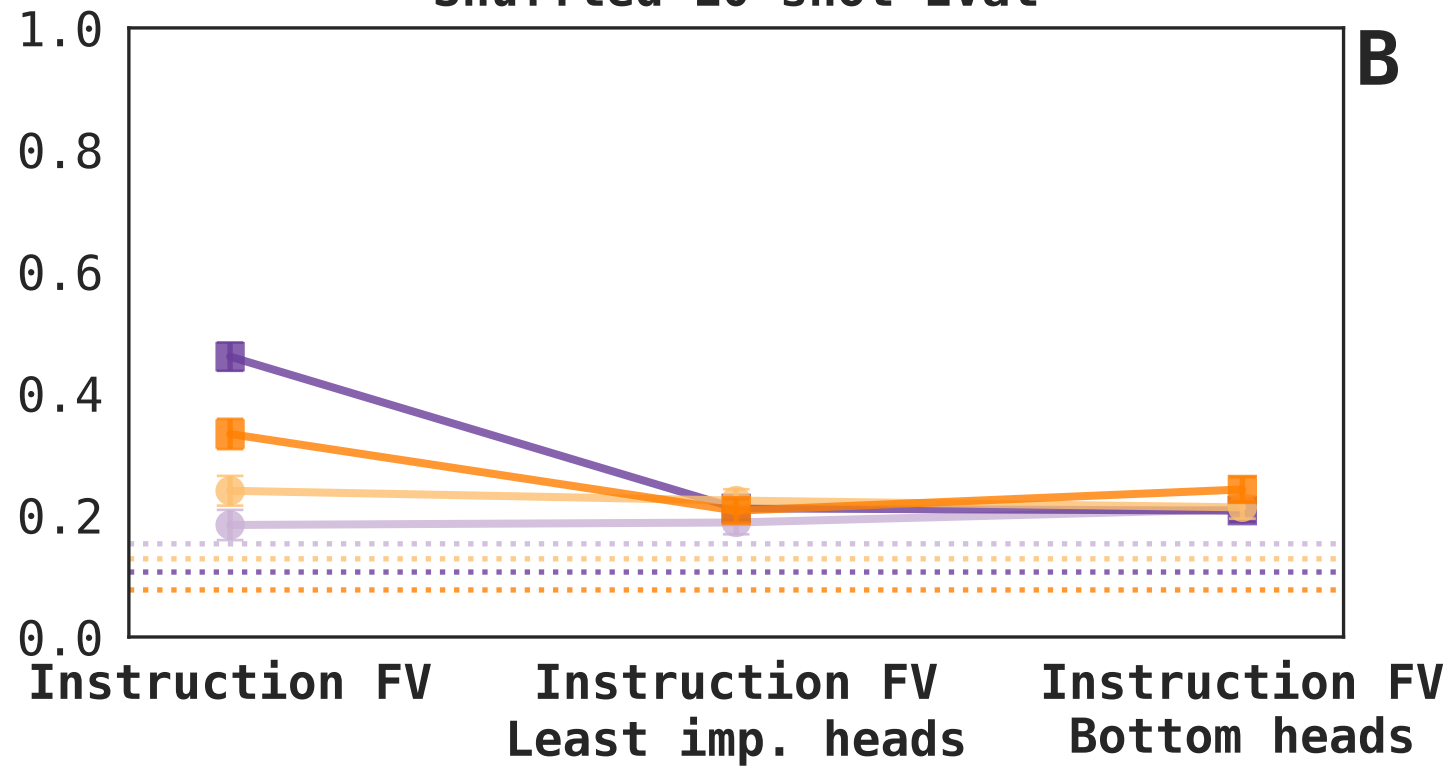

Supplement: supplementary_material [file appendix_finding_4_least_imp_bottom_control_unmatched_evals_max_acc_layer.pdf › 5256_supplementary_code/notebooks/figures/appendix_finding_4_least_imp_bottom_control_unmatched_evals_max_acc_layer.pdf]

0-shot Eval

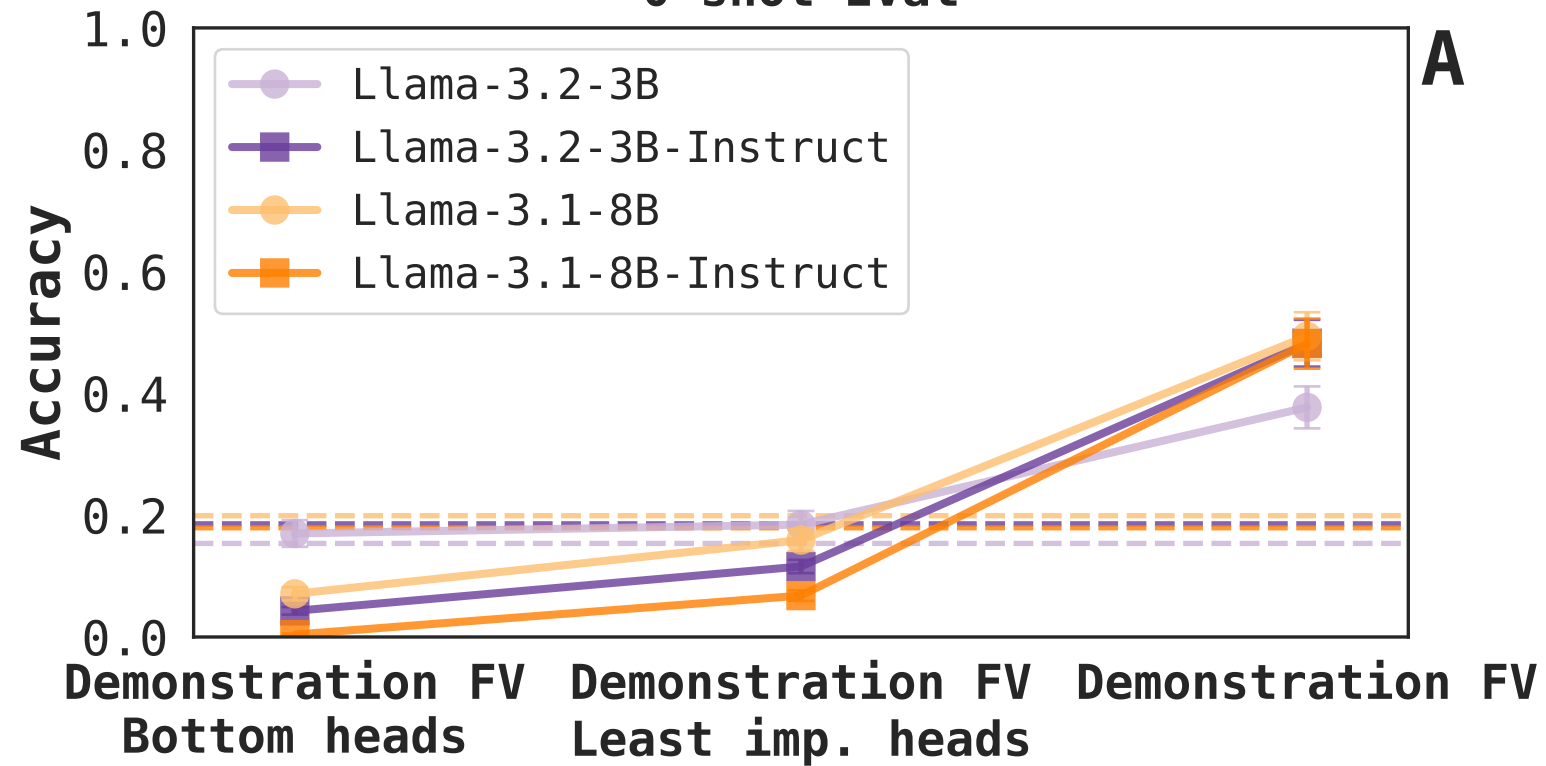

Shuffled 10-shot Eval

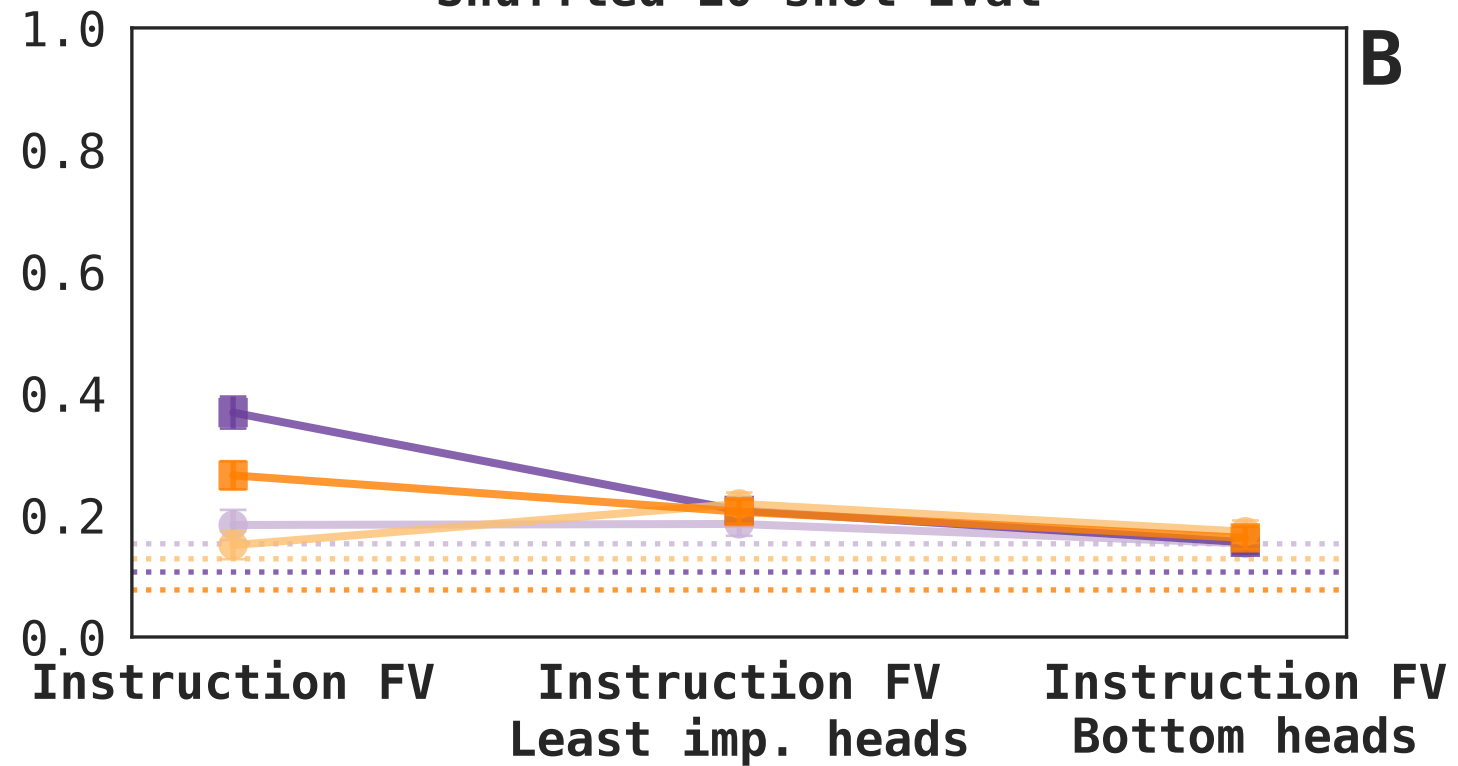

Supplement: supplementary_material [file appendix_finding_4_least_imp_bottom_control_unmatched_evals_one_third_layer.pdf › 5256_supplementary_code/notebooks/figures/appendix_finding_4_least_imp_bottom_control_unmatched_evals_one_third_layer.pdf]

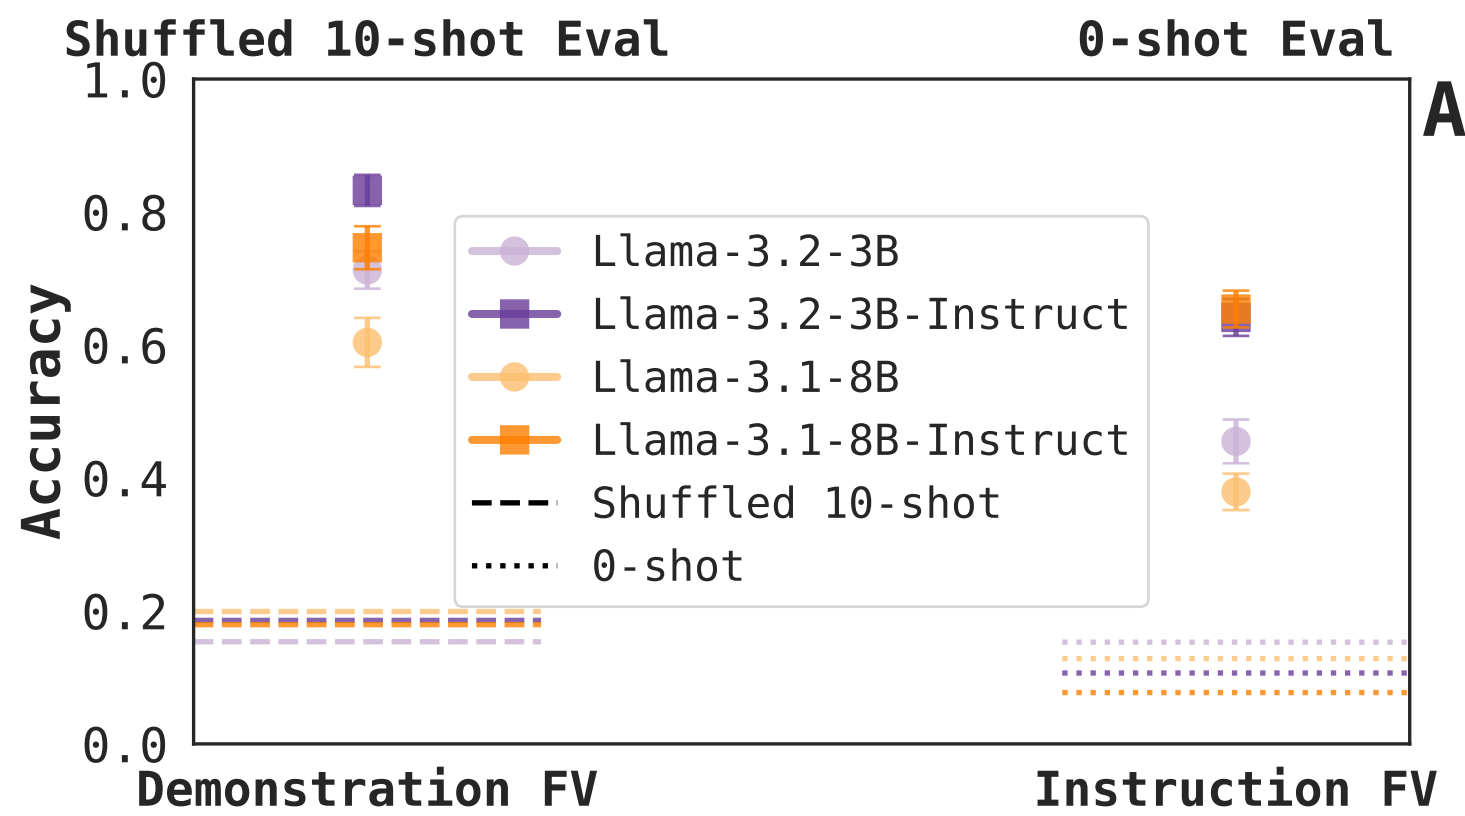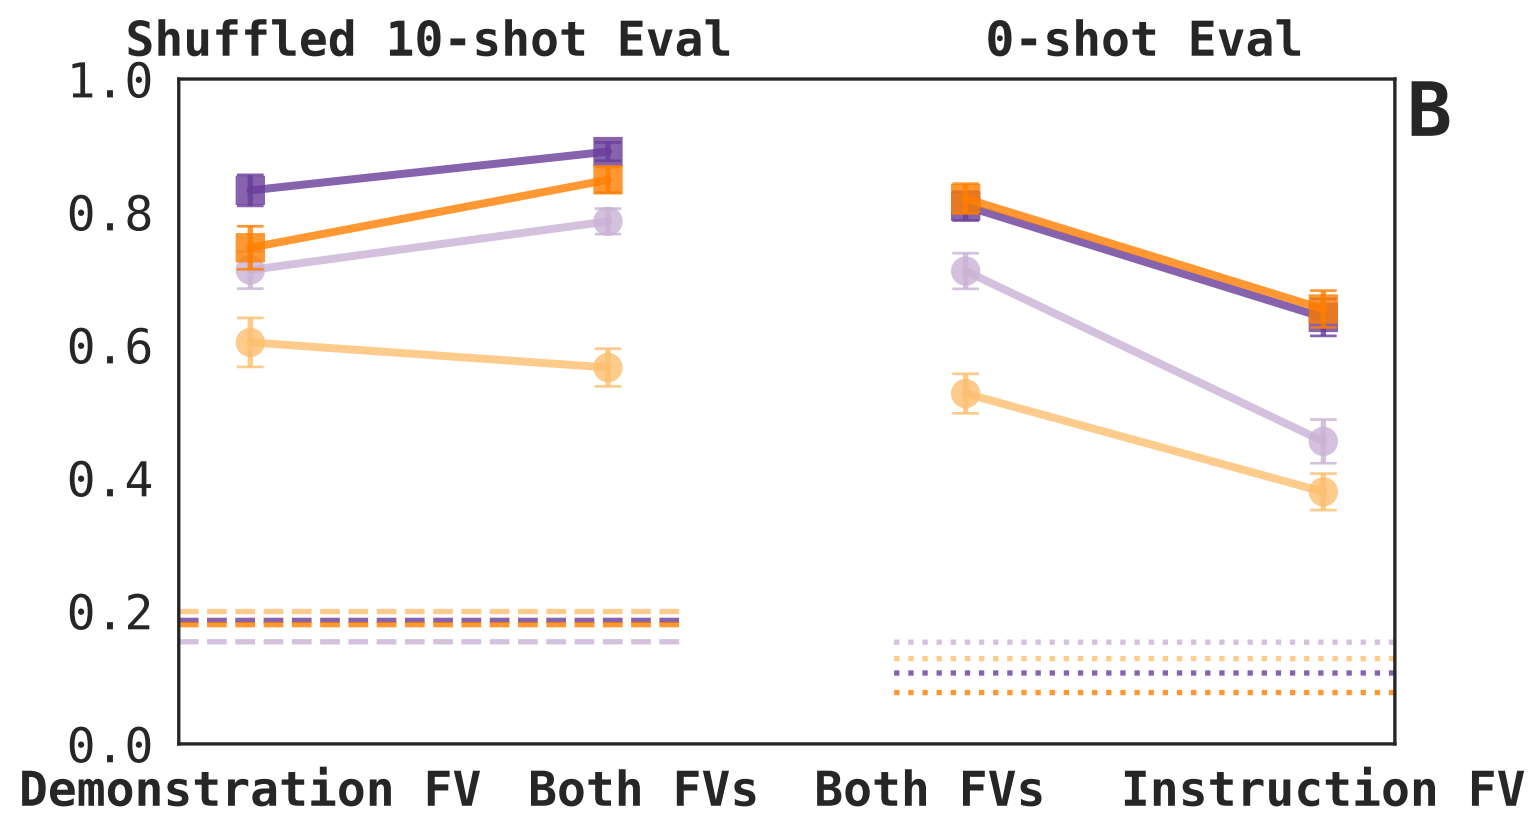

Supplement: supplementary_material [file finding_1_2_main_and_joint_matched_evals_max_acc_layer.pdf › 5256_supplementary_code/notebooks/figures/finding_1_2_main_and_joint_matched_evals_max_acc_layer.pdf]

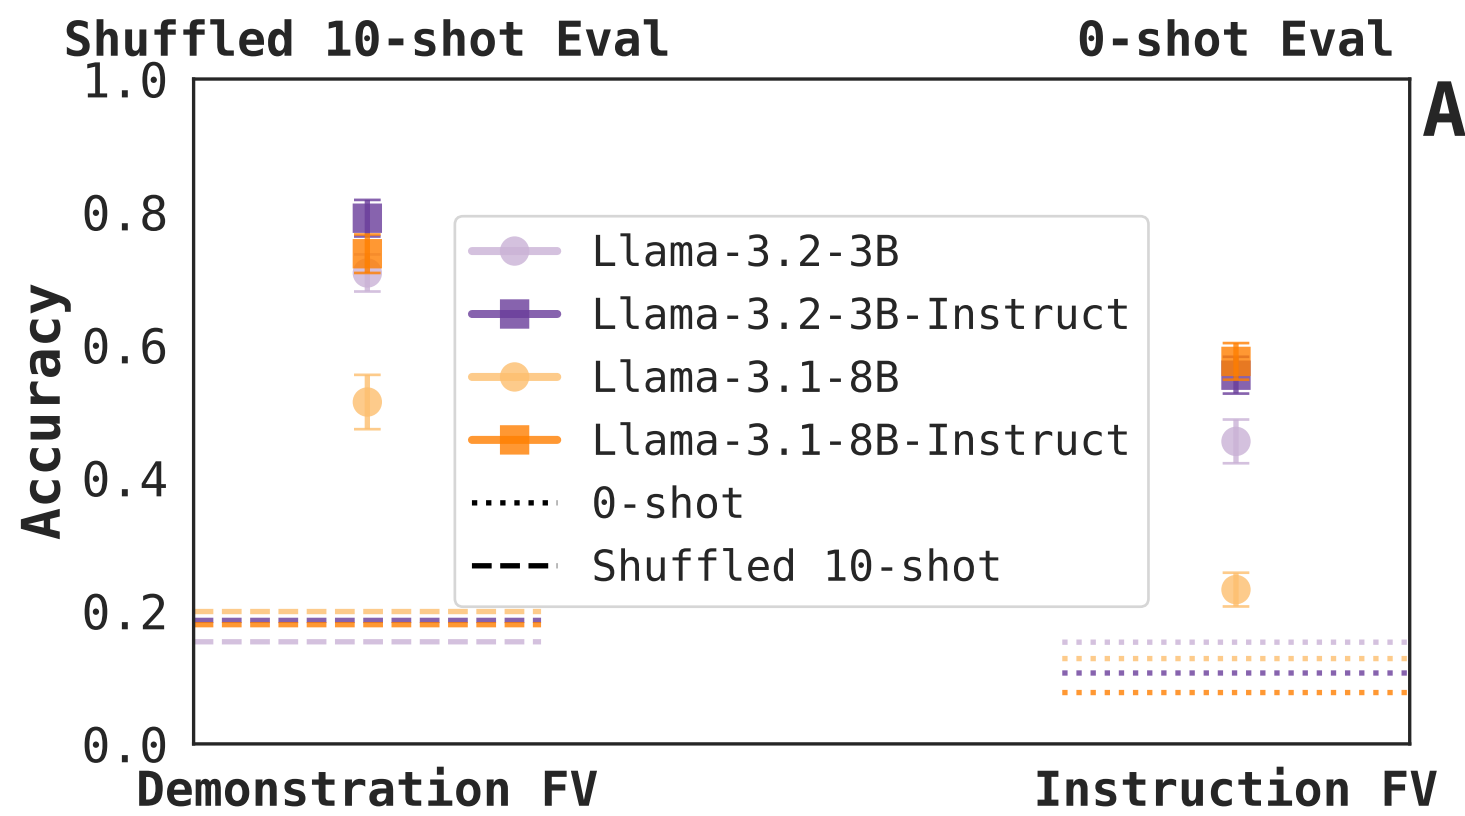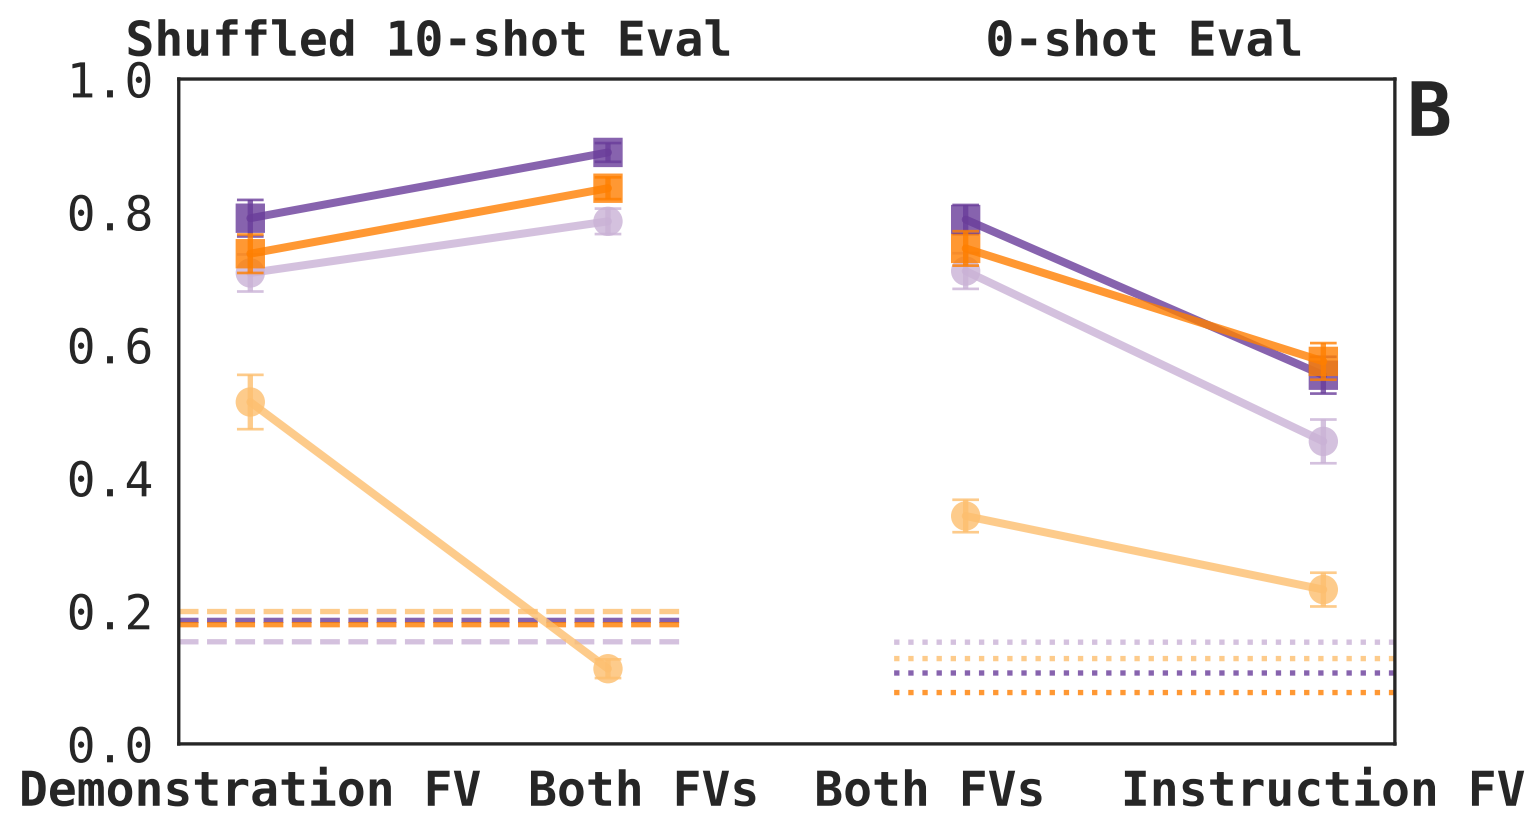

Supplement: supplementary_material [file finding_1_2_main_and_joint_matched_evals_one_third_layer.pdf › 5256_supplementary_code/notebooks/figures/finding_1_2_main_and_joint_matched_evals_one_third_layer.pdf]

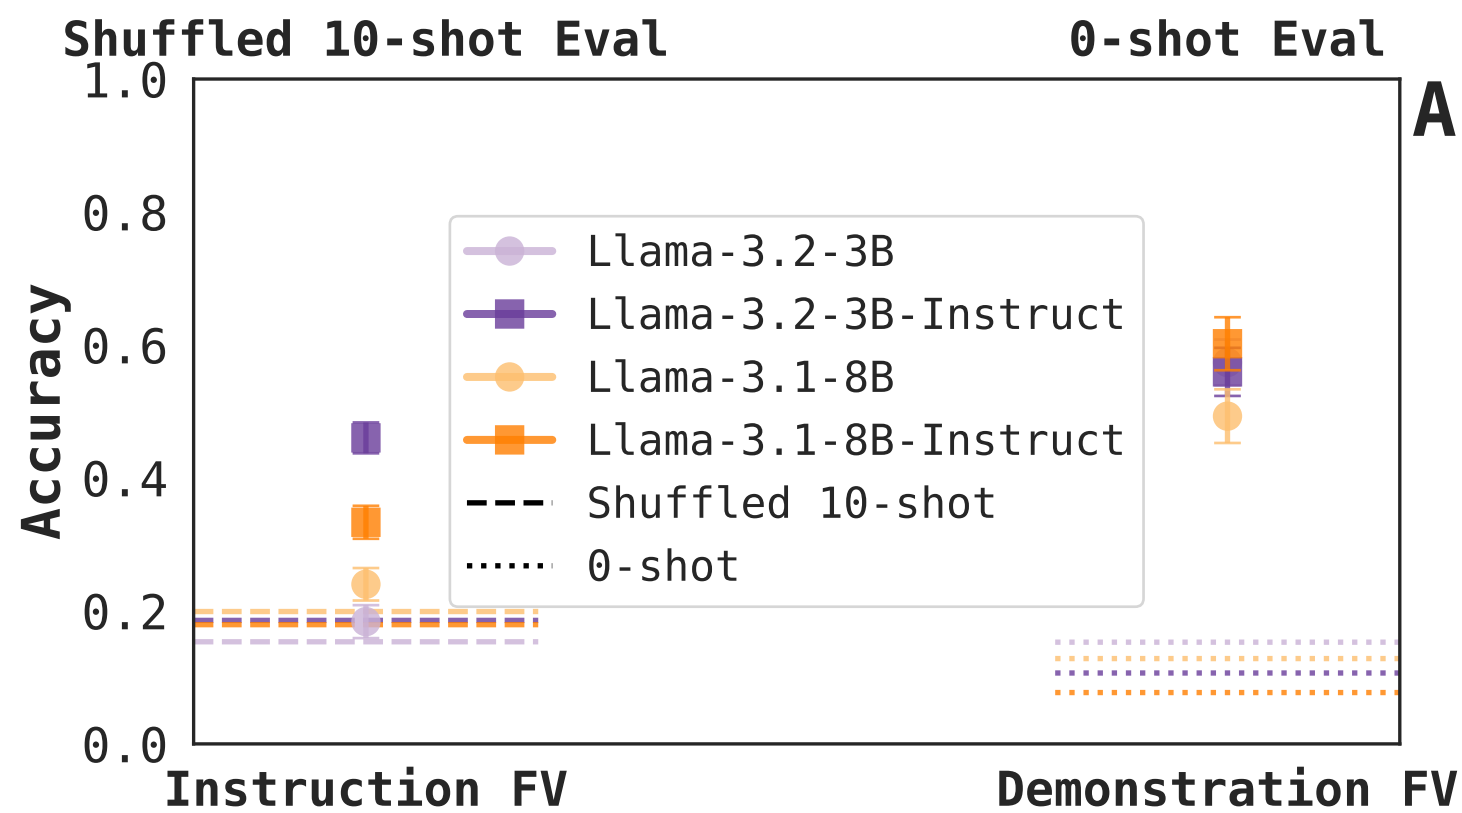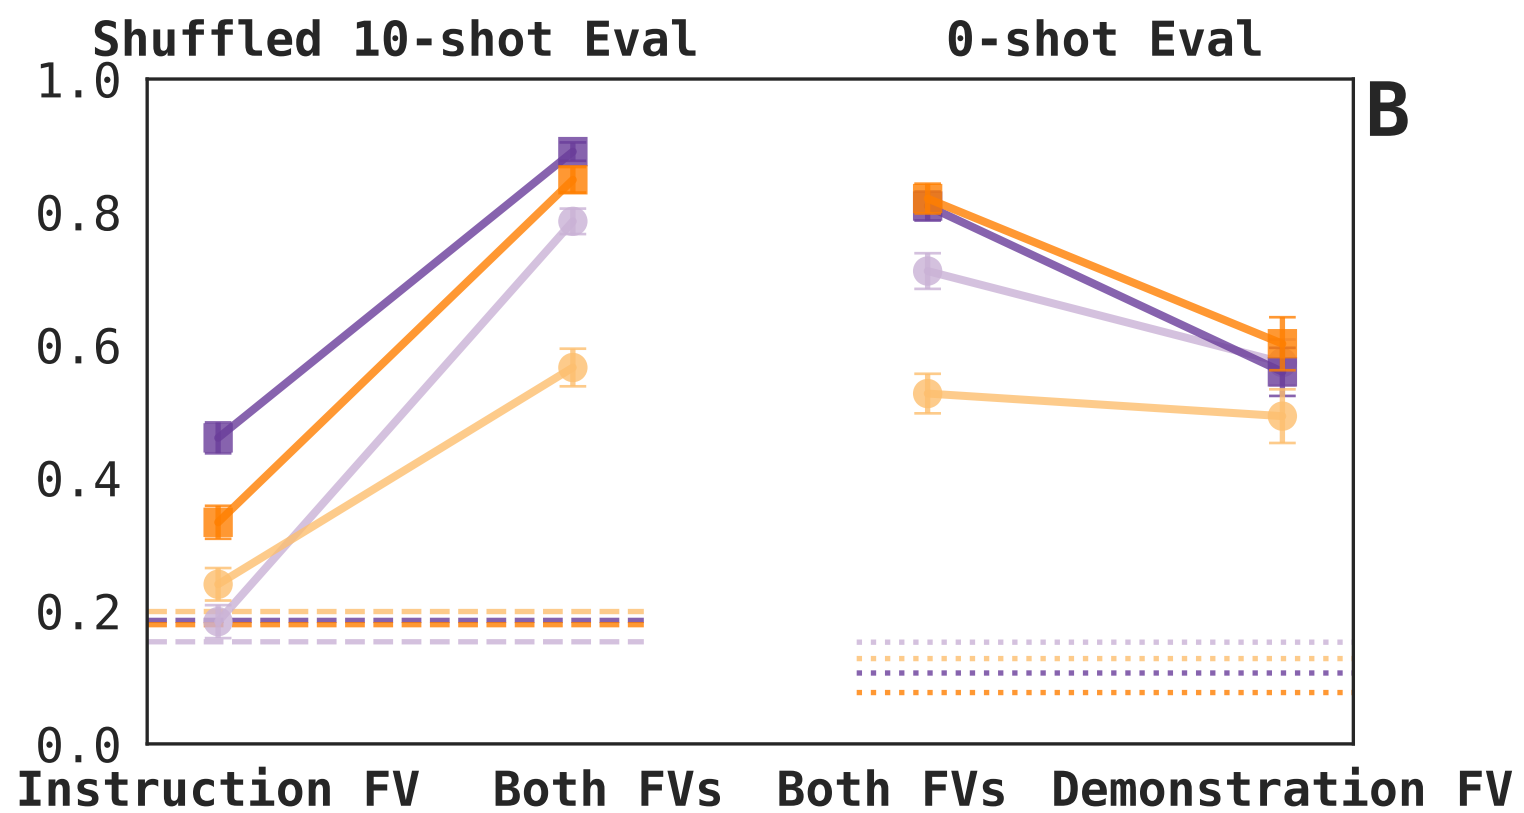

Supplement: supplementary_material [file finding_1_2_main_and_joint_unmatched_evals_max_acc_layer.pdf › 5256_supplementary_code/notebooks/figures/finding_1_2_main_and_joint_unmatched_evals_max_acc_layer.pdf]

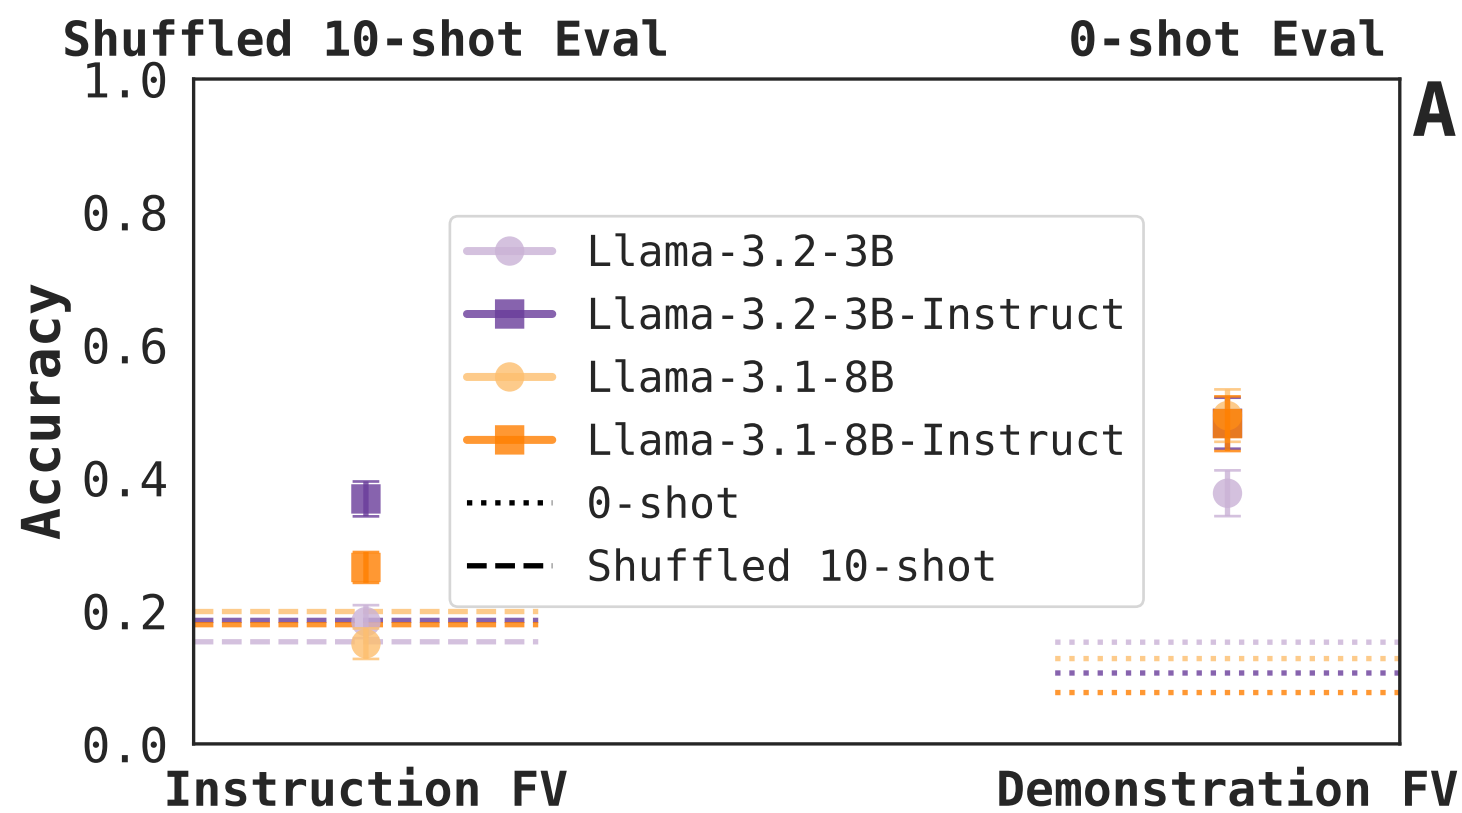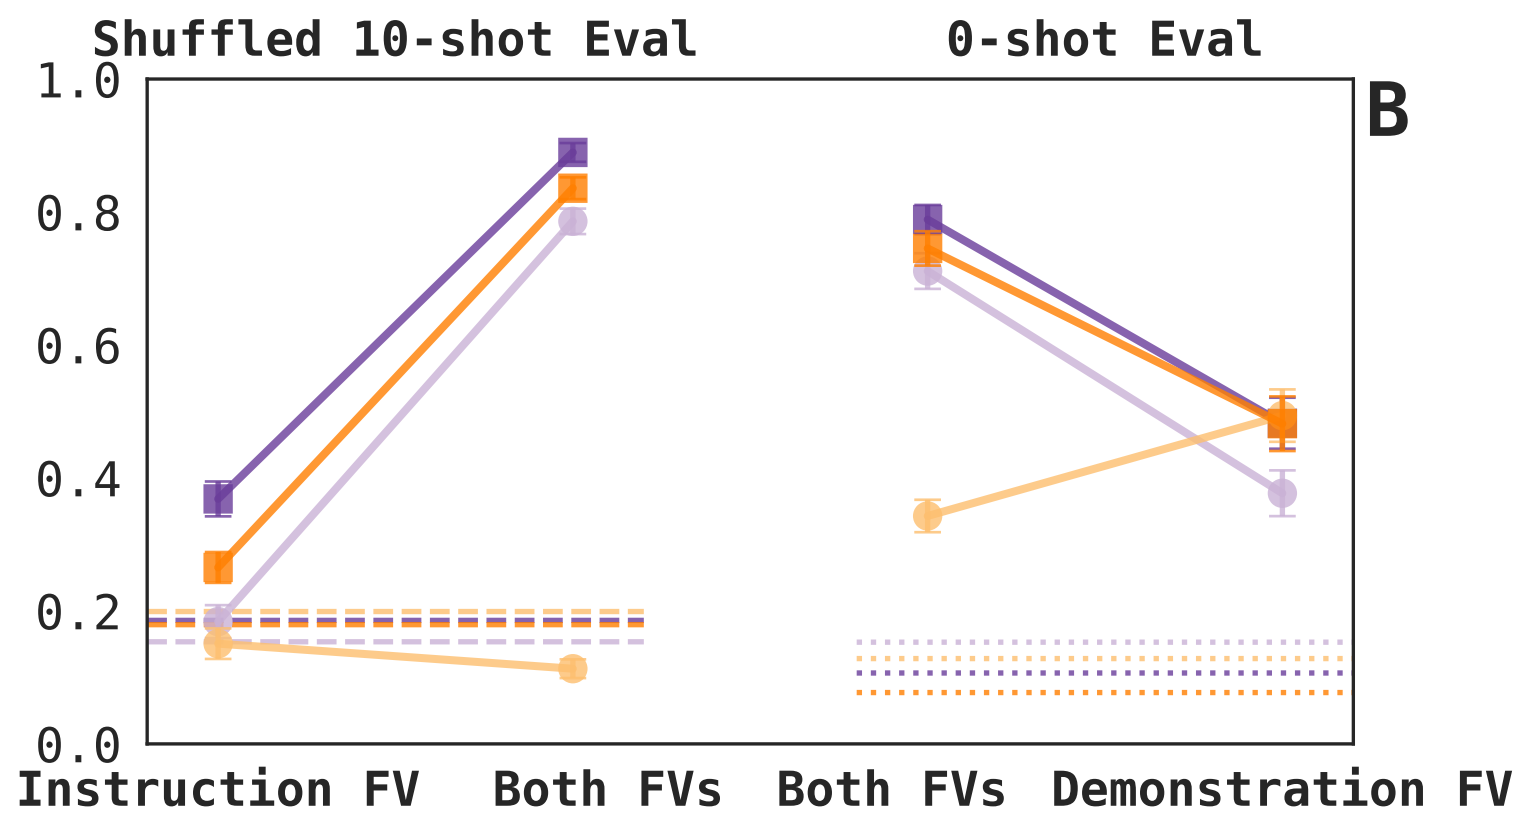

Supplement: supplementary_material [file finding_1_2_main_and_joint_unmatched_evals_one_third_layer.pdf › 5256_supplementary_code/notebooks/figures/finding_1_2_main_and_joint_unmatched_evals_one_third_layer.pdf]

# Llama-3.2-3B Family

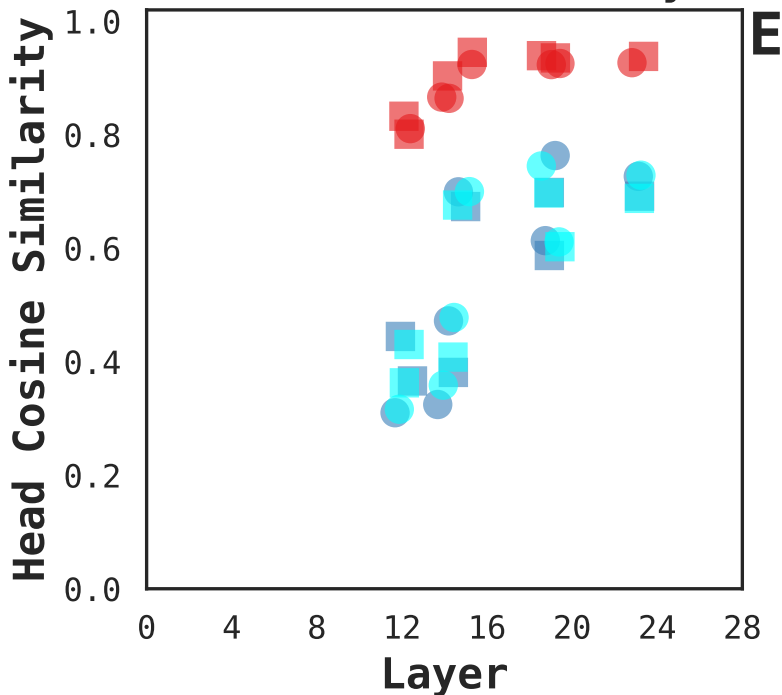

# Llama-3.1-8B Family

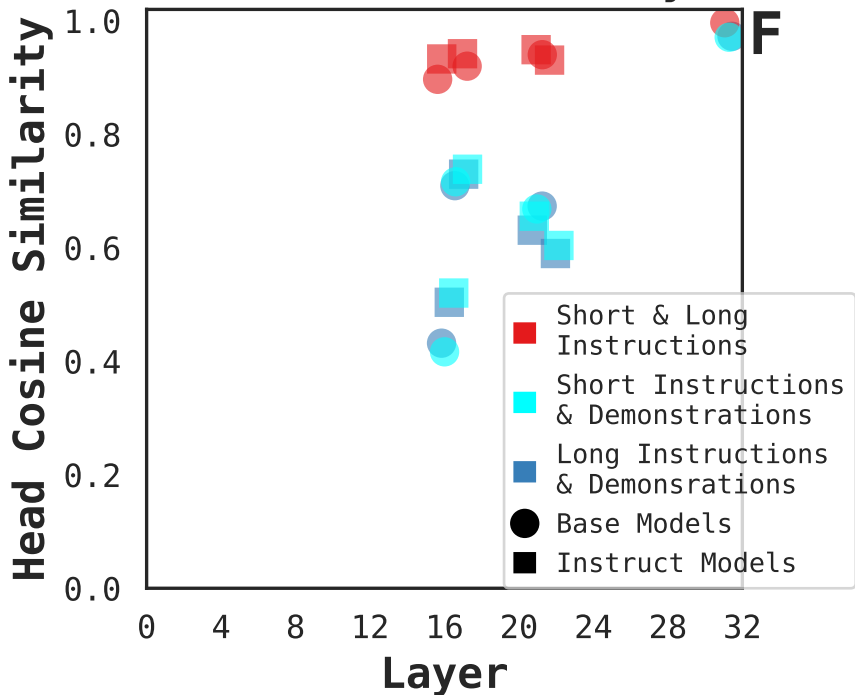

Supplement: supplementary_material [file finding_3_head_similarities.pdf › 5256_supplementary_code/notebooks/figures/finding_3_head_similarities.pdf]

# Shuffled 10-shot Eval

**G**

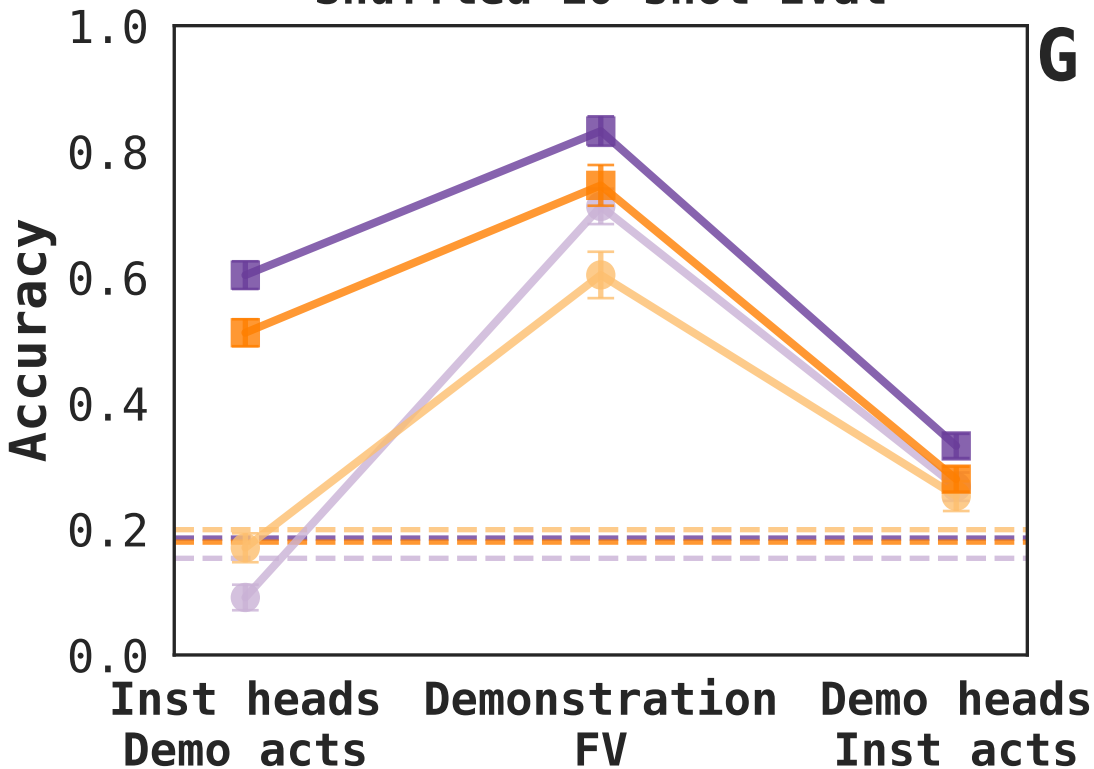

# 0-shot Eval

**H**

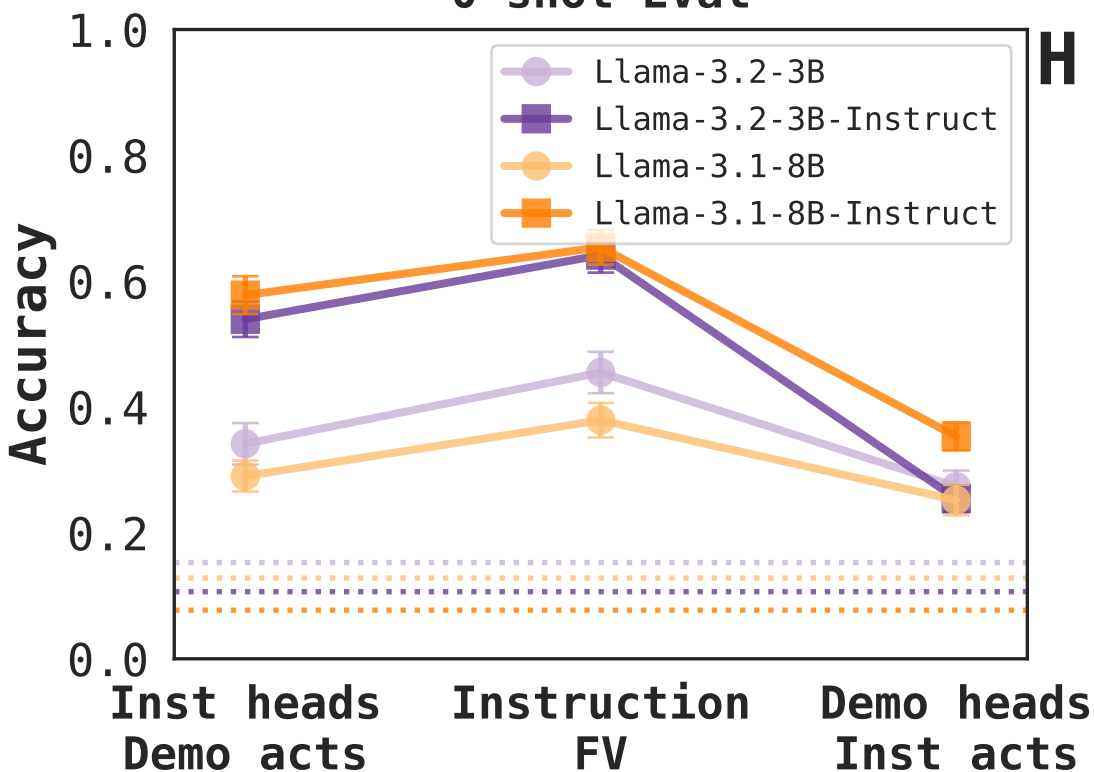

Supplement: supplementary_material [file finding_4_localizers_vertical_matched_evals_max_acc_layer.pdf › 5256_supplementary_code/notebooks/figures/finding_4_localizers_vertical_matched_evals_max_acc_layer.pdf]

# Shuffled 10-shot Eval

**G**

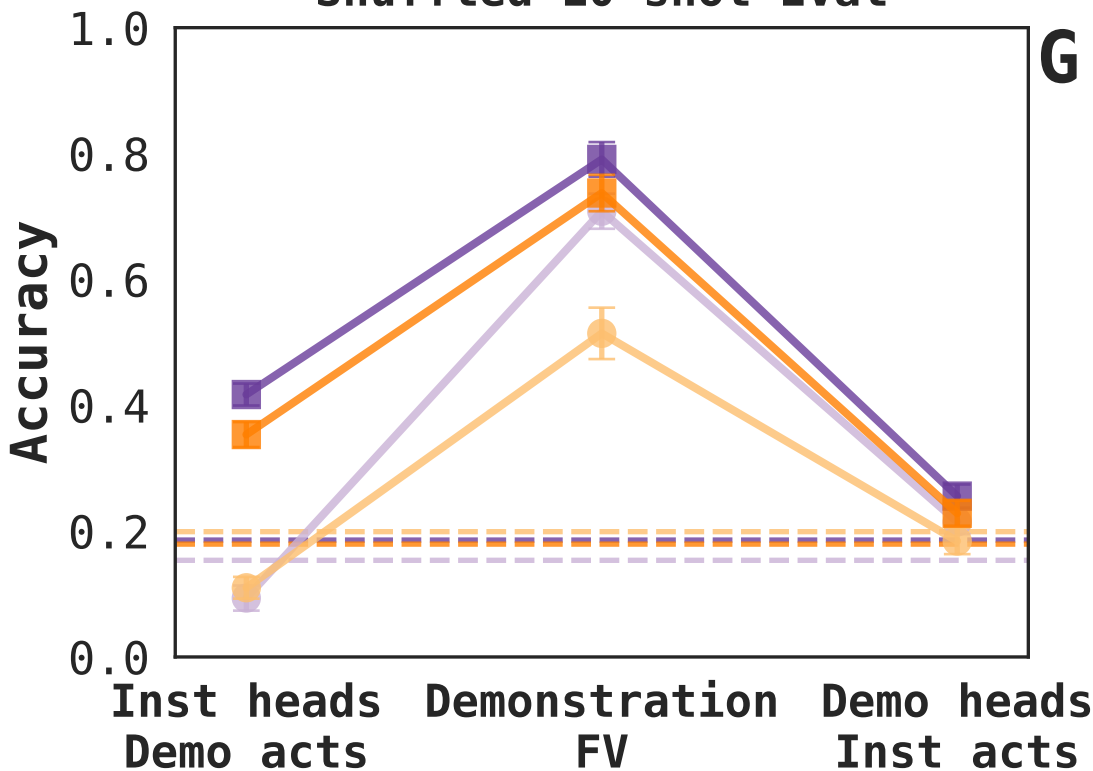

# 0-shot Eval

**H**

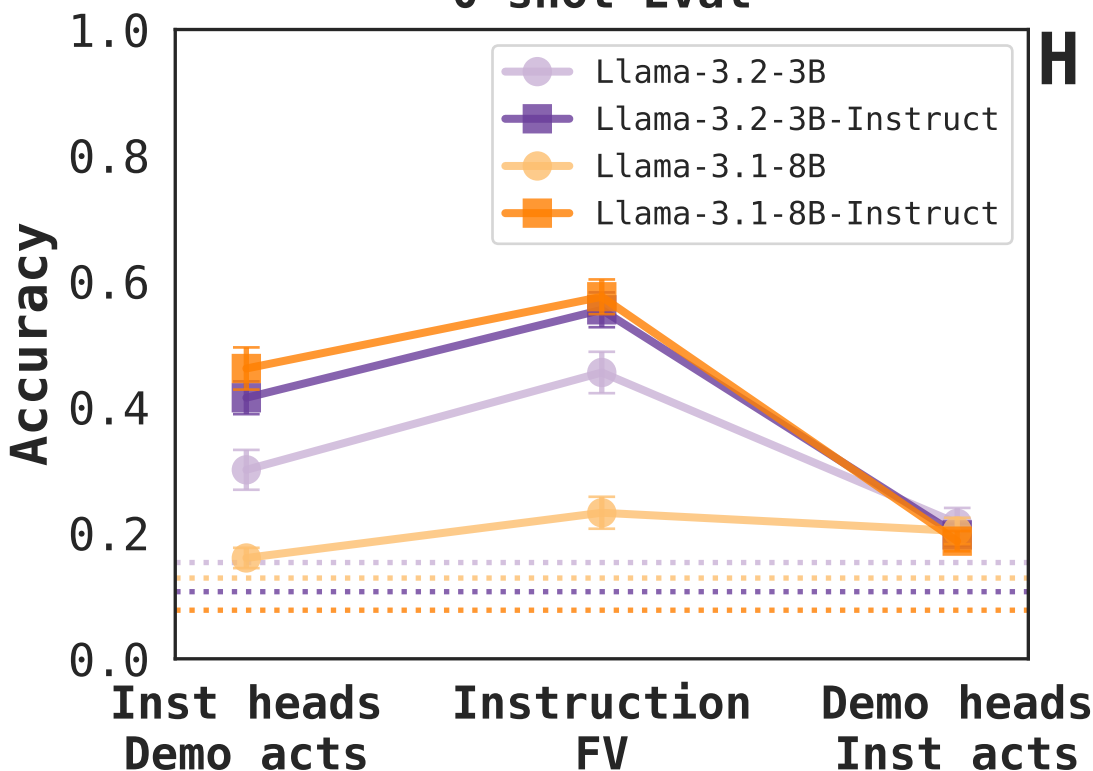

Supplement: supplementary_material [file finding_4_localizers_vertical_matched_evals_one_third_layer.pdf › 5256_supplementary_code/notebooks/figures/finding_4_localizers_vertical_matched_evals_one_third_layer.pdf]

**0-shot Eval**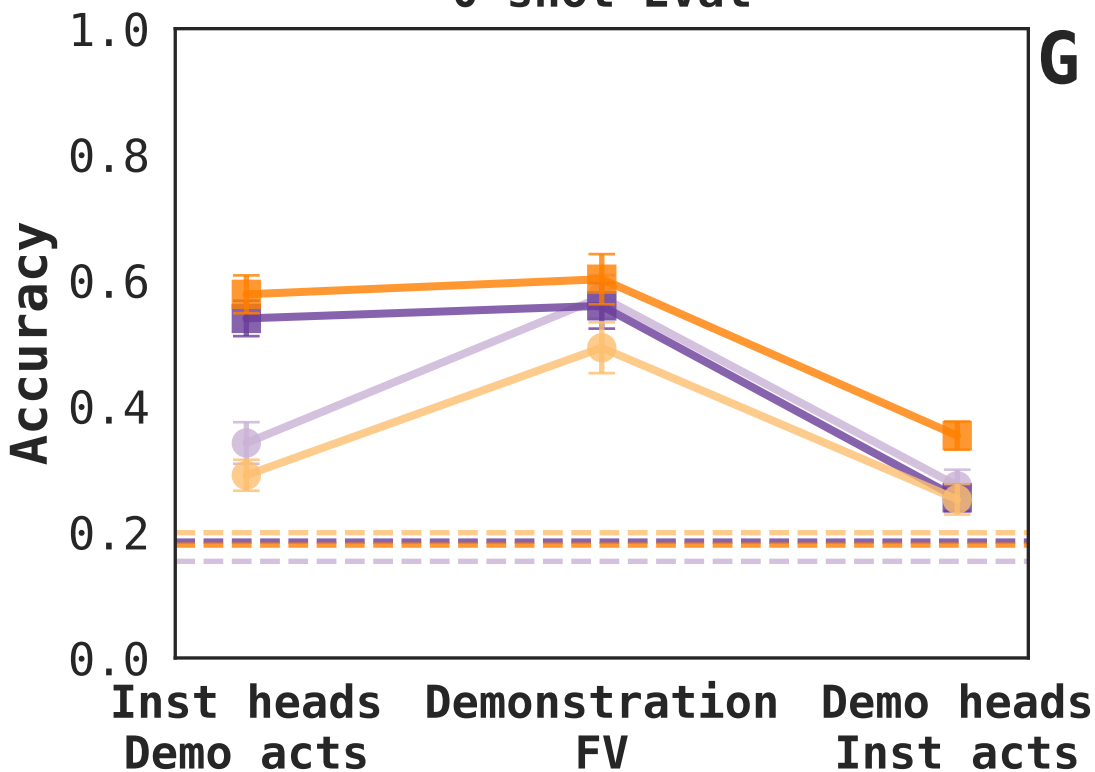**Shuffled 10-shot Eval**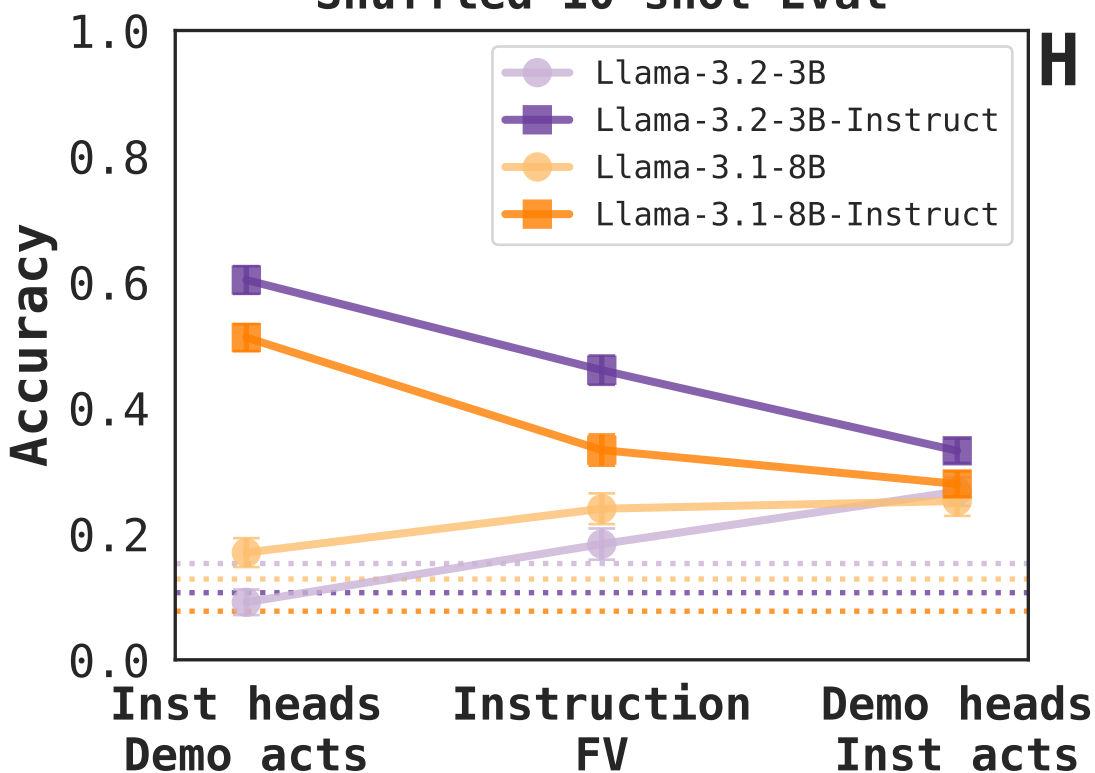

Supplement: supplementary_material [file finding_4_localizers_vertical_unmatched_evals_max_acc_layer.pdf › 5256_supplementary_code/notebooks/figures/finding_4_localizers_vertical_unmatched_evals_max_acc_layer.pdf]

# 0-shot Eval

**G**

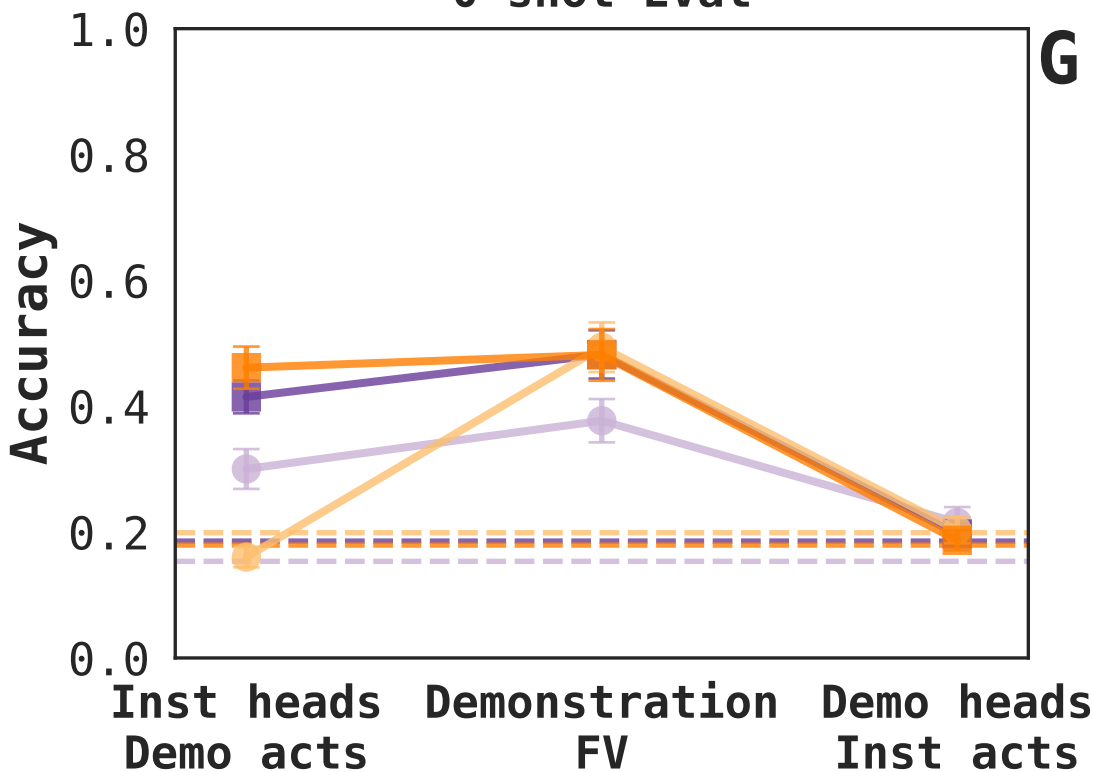

# Shuffled 10-shot Eval

**H**

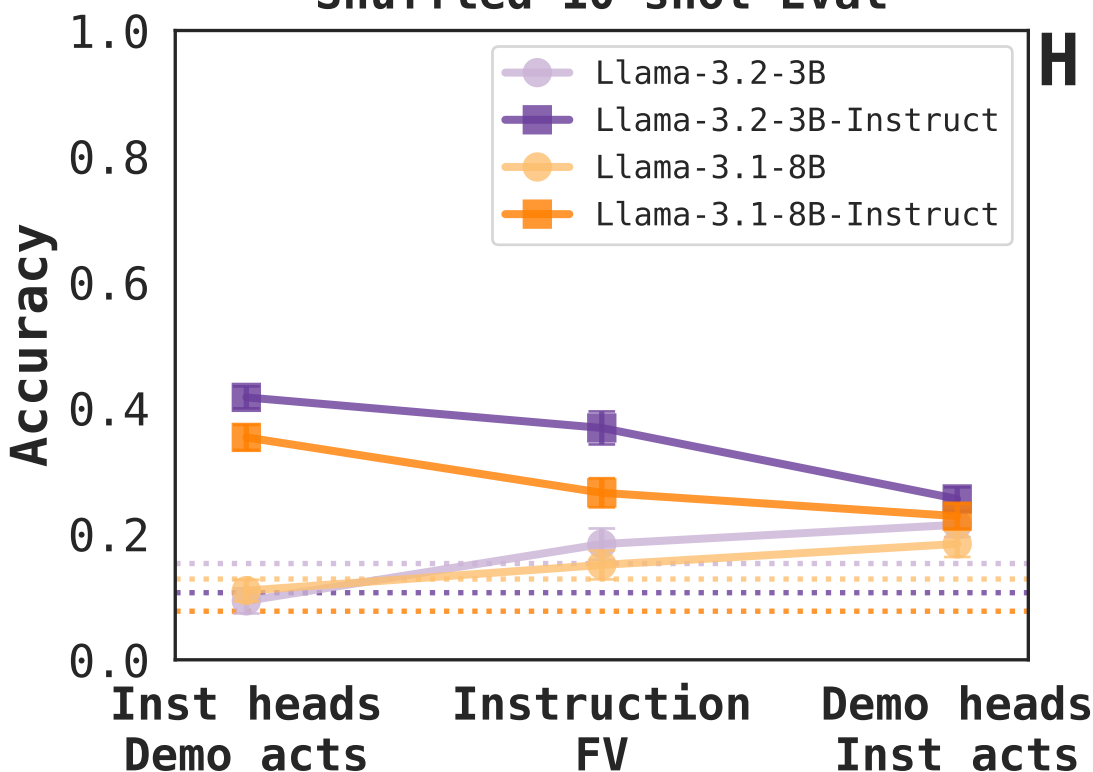

Supplement: supplementary_material [file finding_4_localizers_vertical_unmatched_evals_one_third_layer.pdf › 5256_supplementary_code/notebooks/figures/finding_4_localizers_vertical_unmatched_evals_one_third_layer.pdf]

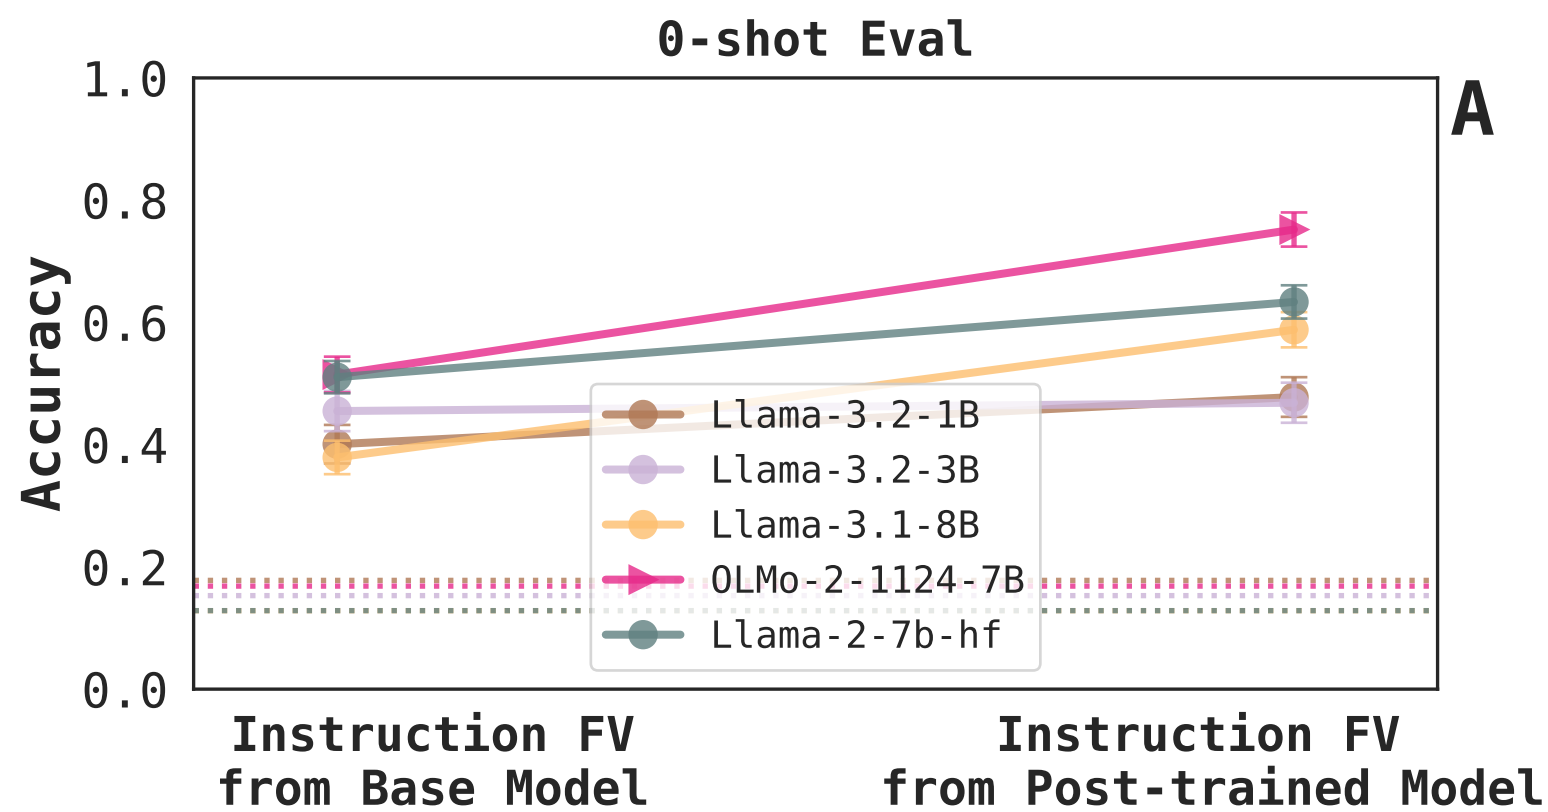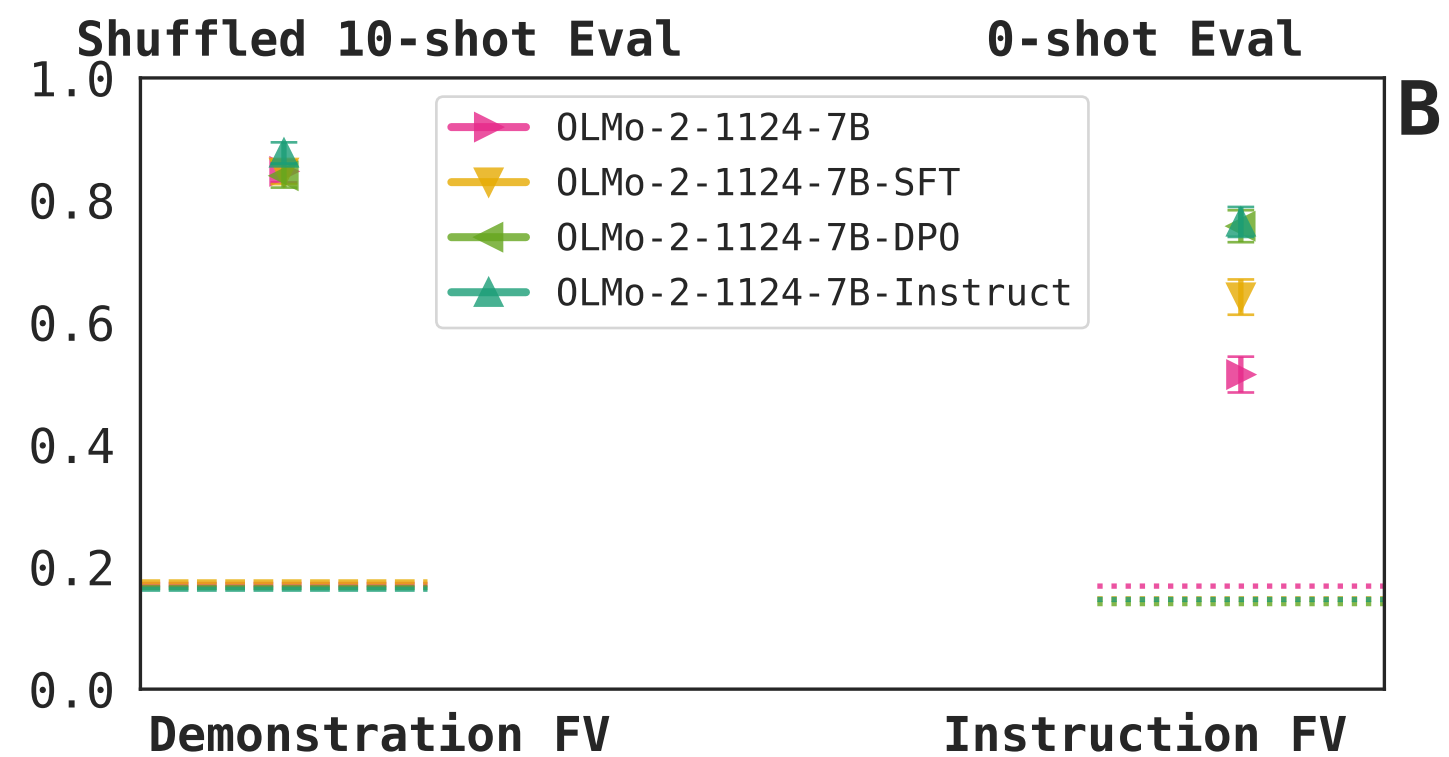

Supplement: supplementary_material [file finding_5_base_inst_olmo_matched_evals_max_acc_layer.pdf › 5256_supplementary_code/notebooks/figures/finding_5_base_inst_olmo_matched_evals_max_acc_layer.pdf]

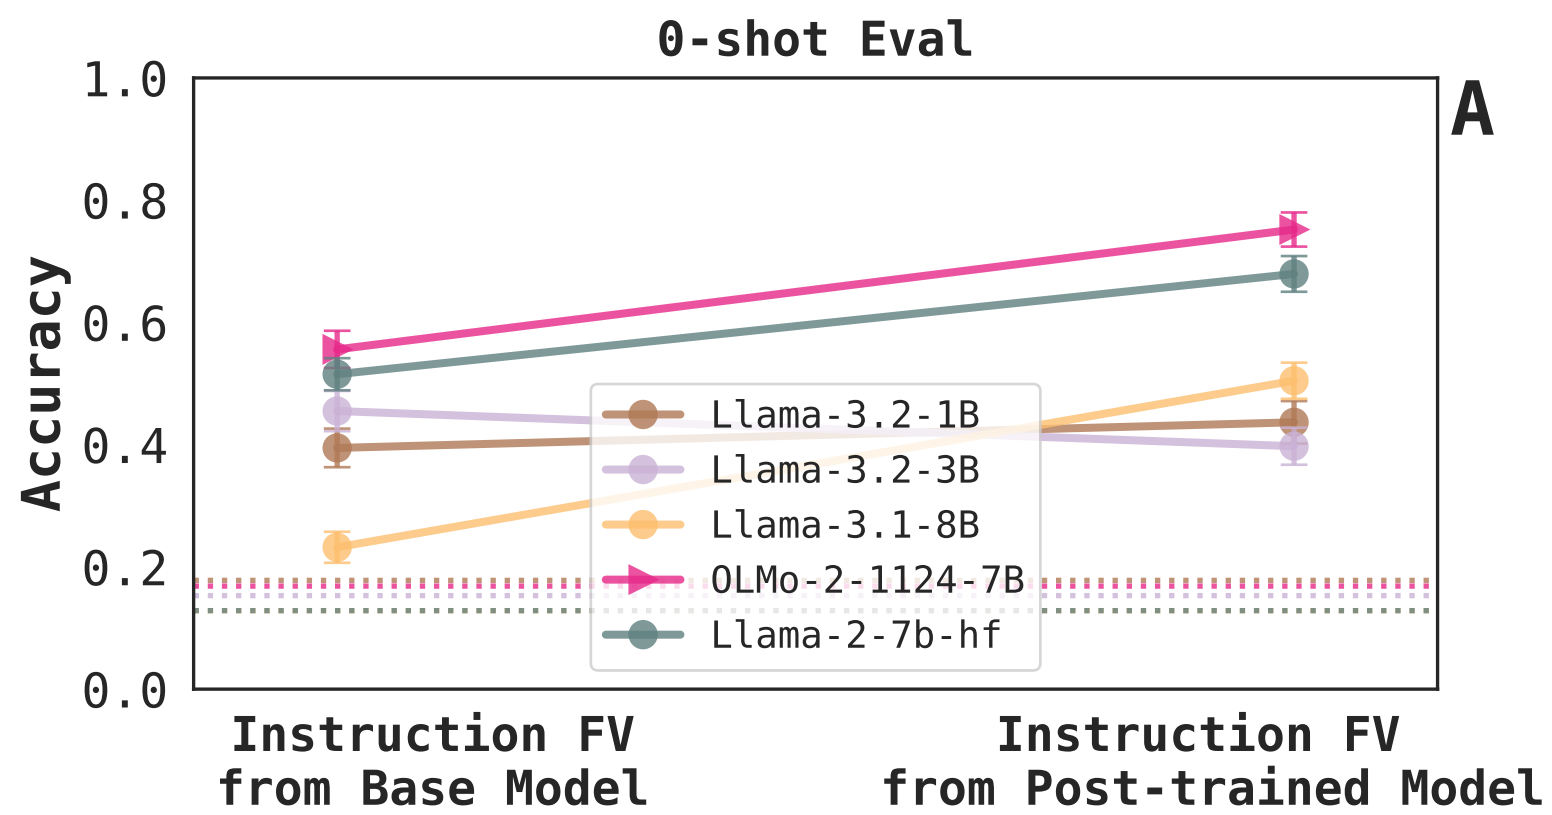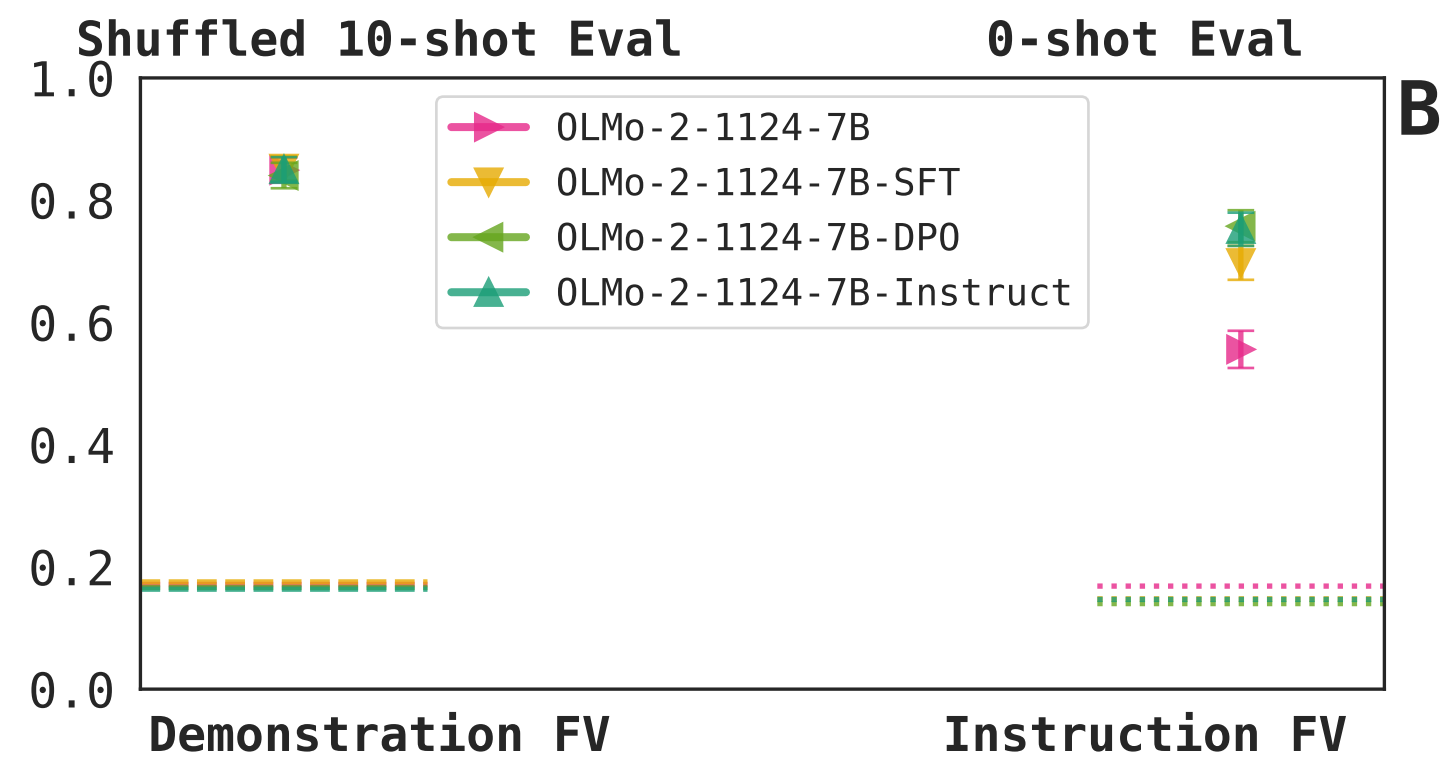

Supplement: supplementary_material [file finding_5_base_inst_olmo_matched_evals_one_third_layer.pdf › 5256_supplementary_code/notebooks/figures/finding_5_base_inst_olmo_matched_evals_one_third_layer.pdf]

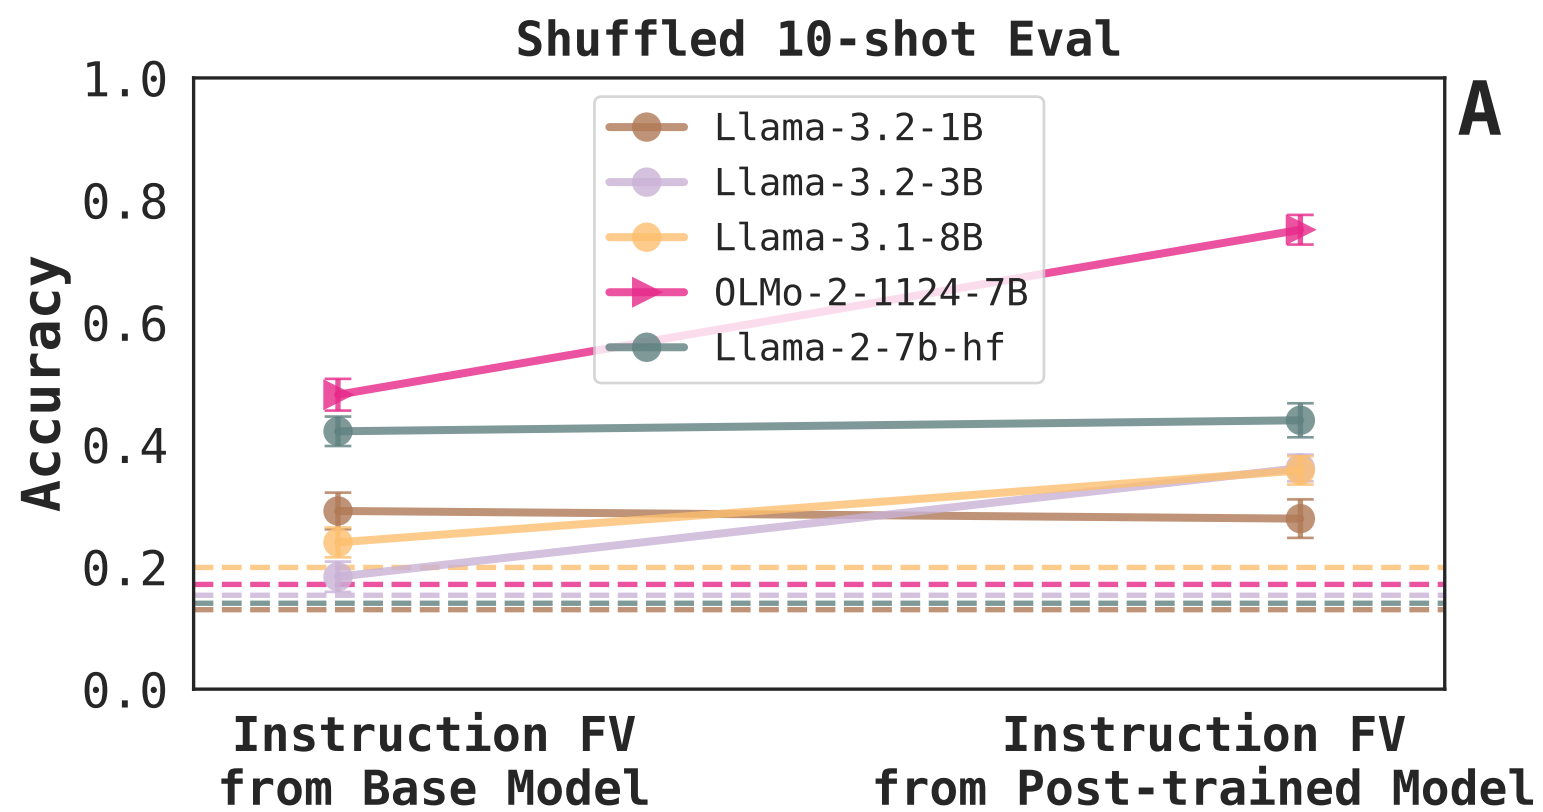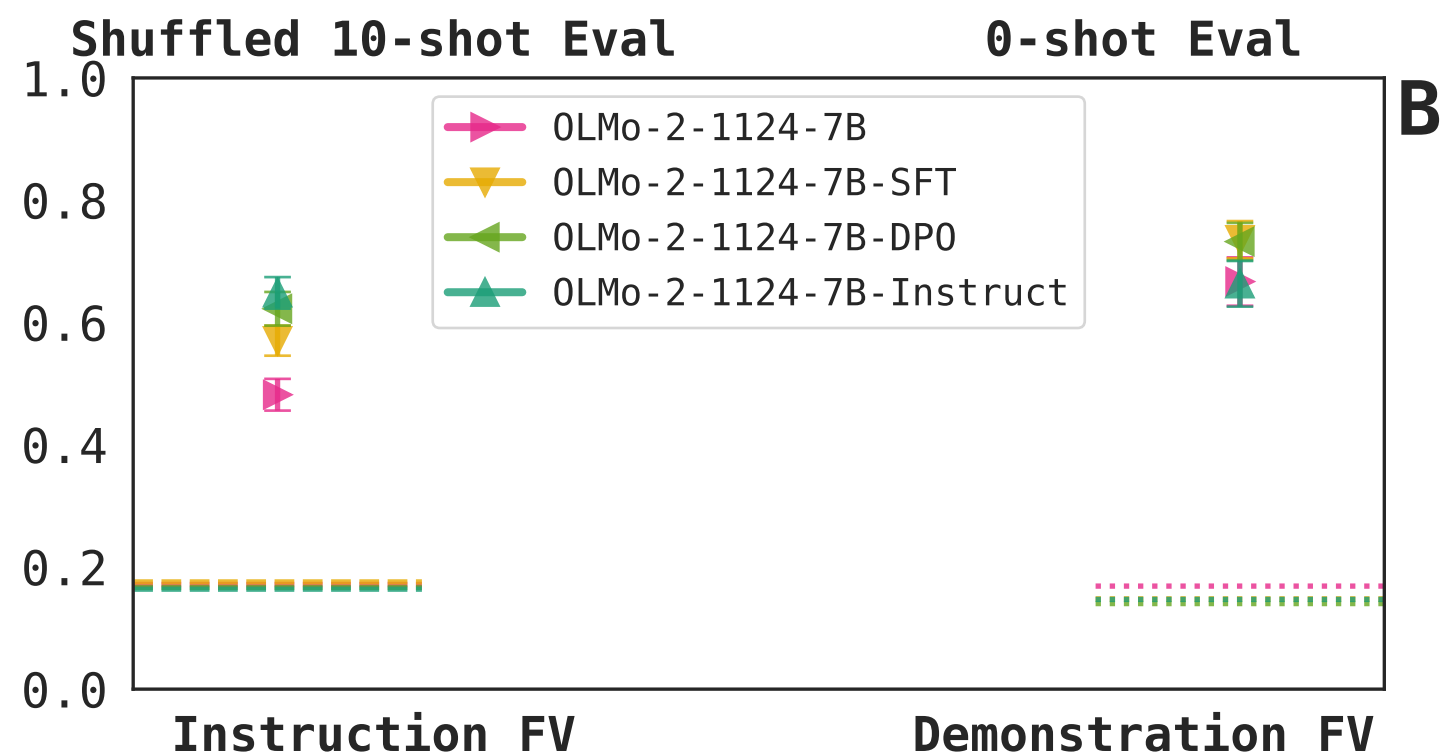

Supplement: supplementary_material [file finding_5_base_inst_olmo_unmatched_evals_max_acc_layer.pdf › 5256_supplementary_code/notebooks/figures/finding_5_base_inst_olmo_unmatched_evals_max_acc_layer.pdf]

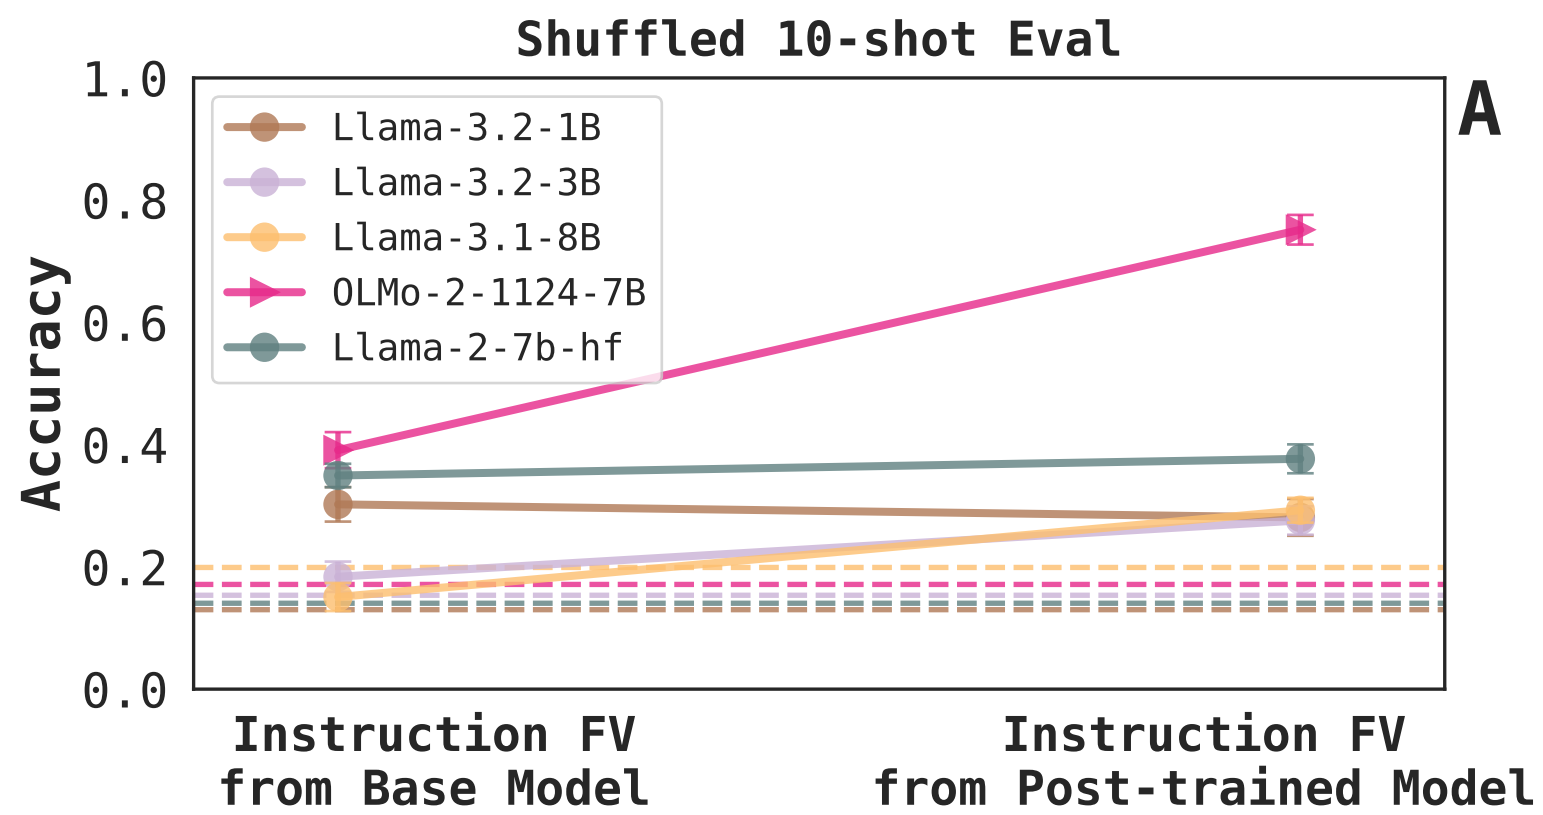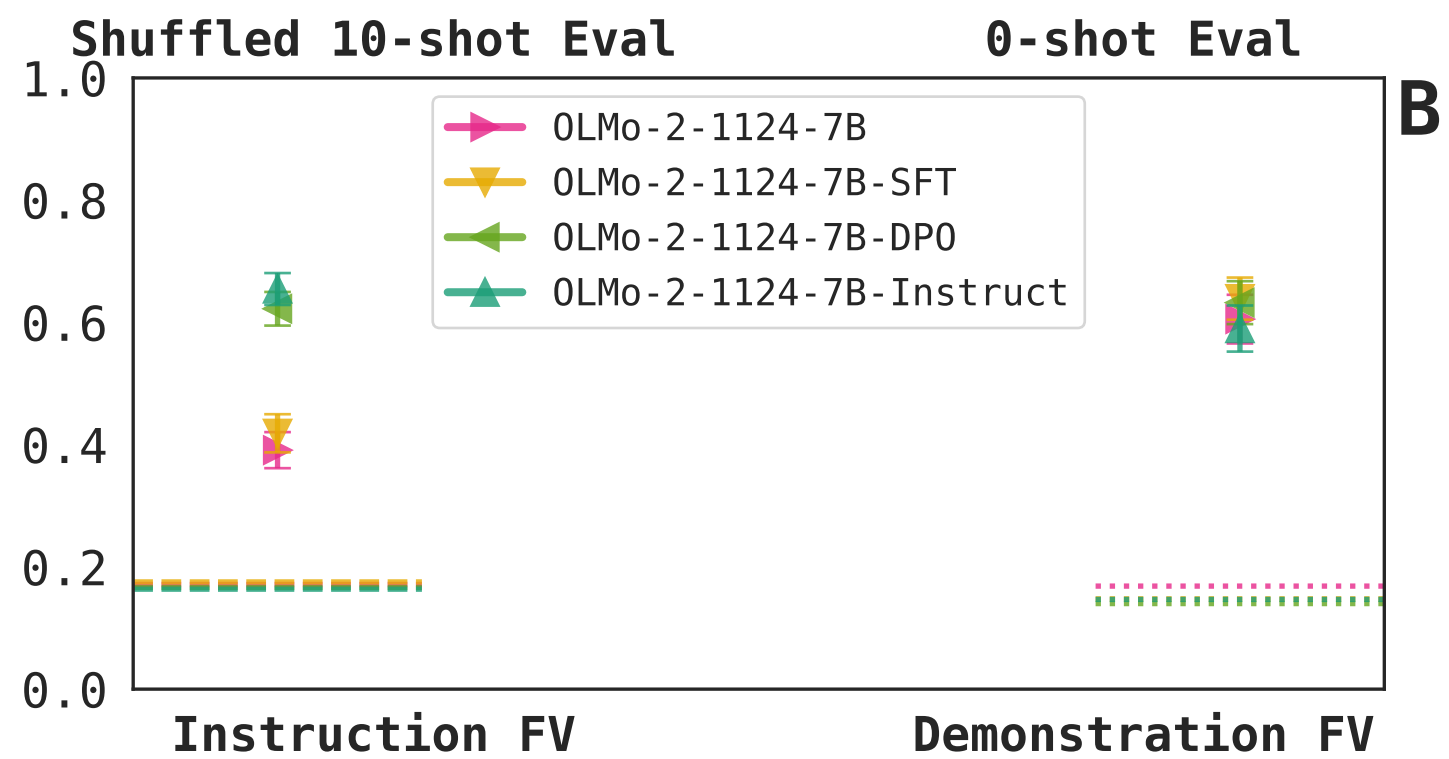

Supplement: supplementary_material [file finding_5_base_inst_olmo_unmatched_evals_one_third_layer.pdf › 5256_supplementary_code/notebooks/figures/finding_5_base_inst_olmo_unmatched_evals_one_third_layer.pdf]
